# Supplementary material for: Comparative efficacy of interventions on nonalcoholic fatty liver disease (NAFLD): A PRISMA-compliant systematic review and network meta-analysis
Source: PubMed Central journal article supplement (PMC4985329; doi:10.1097/md.0000000000004529), 2016-08-12
Supplement: medi-95-e4529-s001.pdf [file medi-95-e4529-s001.pdf]

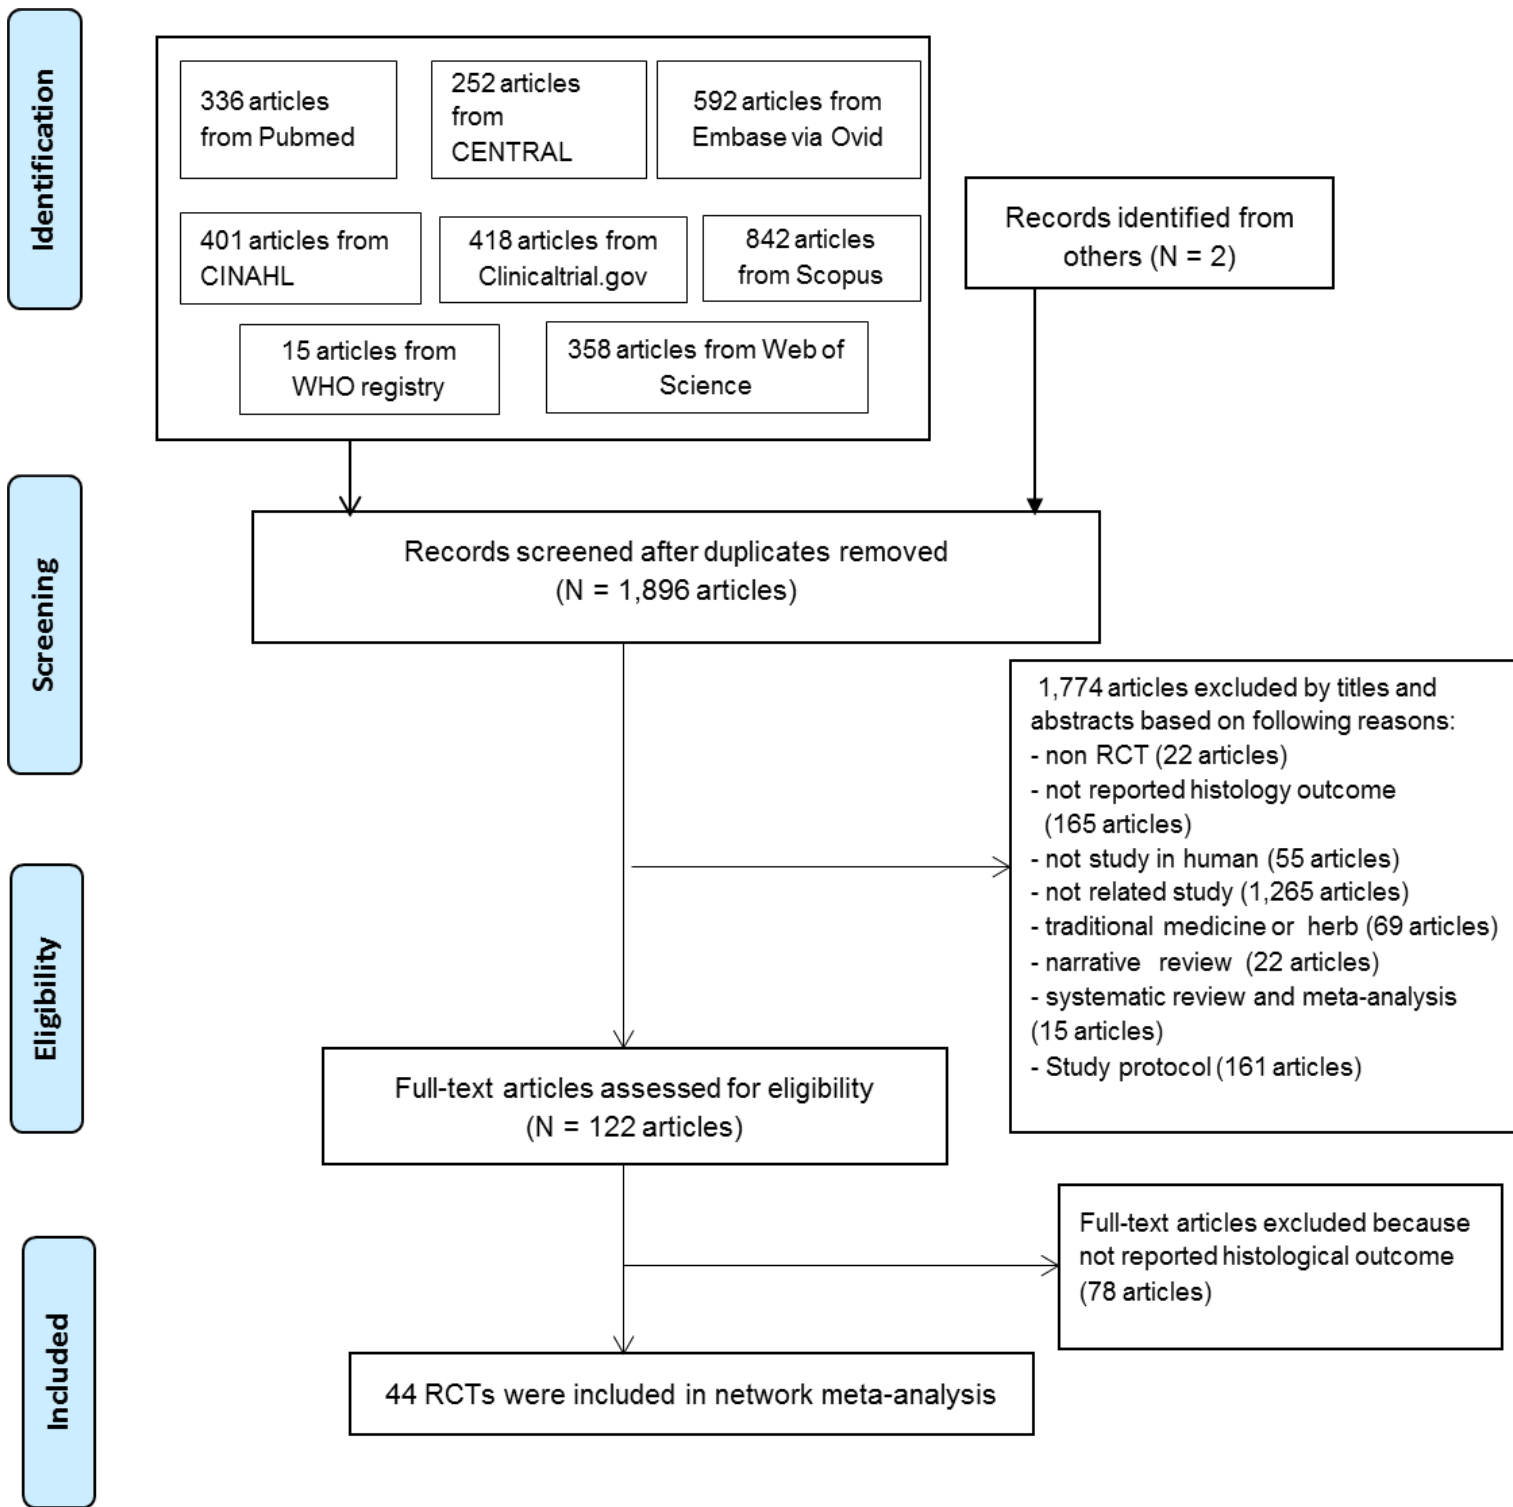

Appendix Figure 1. A flow of study selection

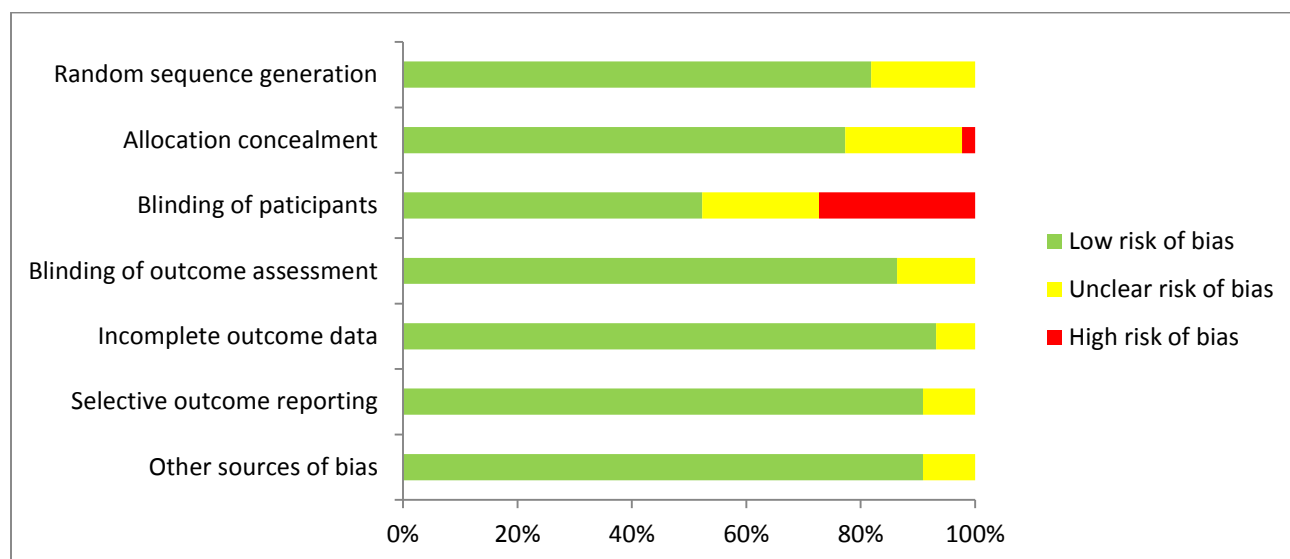

A.

B.

| Adequate sequence generation? | Allocation concealment? | Blinding patient? | Blinding assessor? | Incomplete outcome data? | Selective outcome reporting? | Other sources of bias? | Author, year           |
|-------------------------------|-------------------------|-------------------|--------------------|--------------------------|------------------------------|------------------------|------------------------|
| ?                             | +                       | ?                 | +                  | +                        | +                            | +                      | Abdelmalek MF, 2009    |
| +                             | +                       | ?                 | +                  | +                        | +                            | +                      | Aithal GP, 2008        |
| +                             | +                       | ?                 | +                  | +                        | +                            | +                      | Belfort R, 2006        |
| ?                             | ?                       | -                 | ?                  | ?                        | ?                            | ?                      | Celinski K, 2014       |
| +                             | +                       | +                 | +                  | +                        | +                            | +                      | Dasarathy S, 2015      |
| +                             | +                       | +                 | +                  | +                        | +                            | +                      | Dufour JF, 2006        |
| +                             | +                       | ?                 | +                  | +                        | +                            | +                      | Georgescu EF, 2009     |
| +                             | +                       | +                 | +                  | +                        | +                            | +                      | Gianturco V, 2013      |
| +                             | +                       | -                 | +                  | +                        | +                            | +                      | Gomez EV, 2009         |
| +                             | +                       | +                 | ?                  | +                        | +                            | +                      | Lee YM, 2012           |
| +                             | +                       | -                 | ?                  | +                        | +                            | +                      | Han Y, 2013            |
| +                             | +                       | +                 | +                  | +                        | +                            | +                      | Harrison SA, 2003      |
| +                             | +                       | +                 | +                  | +                        | +                            | +                      | Haukeland JW, 2009     |
| +                             | ?                       | -                 | +                  | +                        | +                            | +                      | <b>Idilman R, 2008</b> |
| +                             | +                       | +                 | +                  | +                        | +                            | +                      | Lavine JE, 2011        |
| +                             | +                       | +                 | +                  | +                        | +                            | +                      | Le TA, 2012            |
| ?                             | +                       | +                 | +                  | +                        | +                            | +                      | Leuschner UFH, 2010    |
| ?                             | ?                       | -                 | ?                  | ?                        | ?                            | ?                      | Li YH, 2015            |
| +                             | +                       | +                 | +                  | +                        | +                            | +                      | Lindor KD, 2004        |
| +                             | +                       | +                 | +                  | +                        | +                            | ?                      | Loguercio C, 2012      |
| +                             | +                       | +                 | +                  | +                        | ?                            | +                      | Malaguarnera M, 2010   |
| ?                             | ?                       | ?                 | +                  | +                        | ?                            | ?                      | Nelson A, 2009         |
| +                             | +                       | +                 | +                  | +                        | +                            | +                      | Tetri BAN, 2015        |
| +                             | +                       | -                 | +                  | +                        | +                            | +                      | Nobili V, 2008         |
| ?                             | ?                       | -                 | +                  | +                        | +                            | +                      | Omer Z, 2010           |
| +                             | +                       | -                 | +                  | +                        | +                            | +                      | Promrat K, 2010        |

| Adequate sequence generation? | Allocation concealment? | Blinding patient? | Blinding assessor? | Incomplete outcome data? | Selective outcome reporting? | Other sources of bias? | Author, year        |
|-------------------------------|-------------------------|-------------------|--------------------|--------------------------|------------------------------|------------------------|---------------------|
| +                             | +                       | ?                 | +                  | +                        | +                            | +                      | Ratziu V, 2008      |
| ?                             | ?                       | ?                 | +                  | +                        | +                            | +                      | Rinella ME, 2009    |
| +                             | ?                       | +                 | +                  | +                        | +                            | +                      | Sanyal AJ, 2004     |
| +                             | +                       | +                 | +                  | +                        | +                            | +                      | Sanyal AJ, 2010     |
| +                             | +                       | +                 | +                  | +                        | +                            | +                      | Sharma BC, 2012     |
| +                             | +                       | -                 | +                  | +                        | +                            | +                      | Shields WW, 2009    |
| +                             | +                       | -                 | +                  | +                        | +                            | +                      | Takeshita Y, 2014   |
| +                             | +                       | -                 | +                  | +                        | +                            | +                      | Torres DM, 2011     |
| +                             | -                       | -                 | ?                  | +                        | +                            | +                      | Uygun A, 2004       |
| +                             | +                       | +                 | +                  | +                        | +                            | +                      | Van Wagner LB, 2011 |
| +                             | +                       | +                 | +                  | +                        | +                            | +                      | Zein CO, 2012       |
| +                             | +                       | +                 | +                  | +                        | +                            | +                      | Zelber-sagi S, 2006 |
| ?                             | ?                       | ?                 | +                  | +                        | +                            | +                      | Sturm N, 2009       |
| +                             | +                       | +                 | +                  | +                        | +                            | +                      | Shenoy KT, 2014     |
| +                             | +                       | +                 | +                  | +                        | +                            | +                      | Argo, CK.           |
| +                             | +                       | +                 | +                  | +                        | +                            | +                      | Nogueira MA, 2015   |
| +                             | +                       | +                 | +                  | ?                        | +                            | +                      | Loomba R, 2015      |
| +                             | ?                       | ?                 | ?                  | +                        | +                            | +                      | Sanyal AJ, 2014     |

**Appendix Figure 2.** Summary (A) and individual (B) risk of bias (ROB) of all included studies.

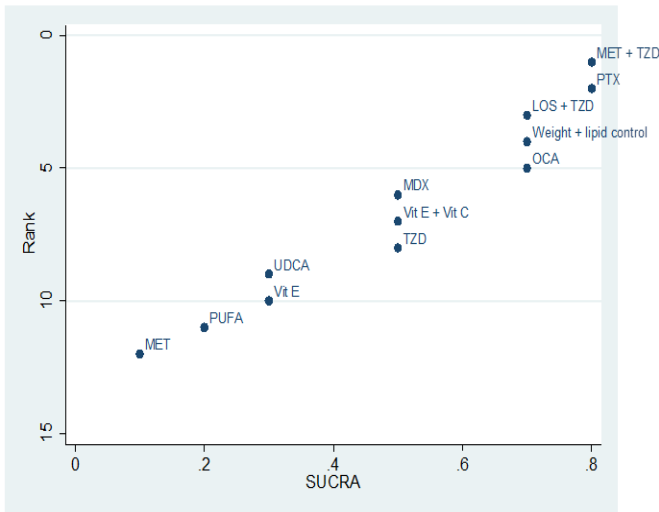

**A. Fibrosis**

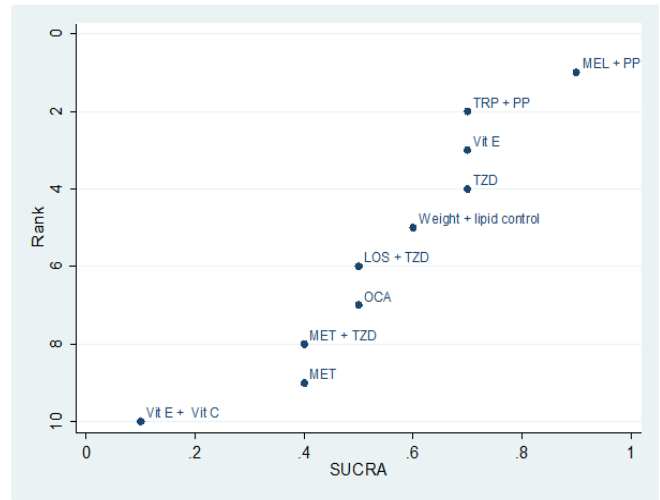

**B. Resolution of NASH**

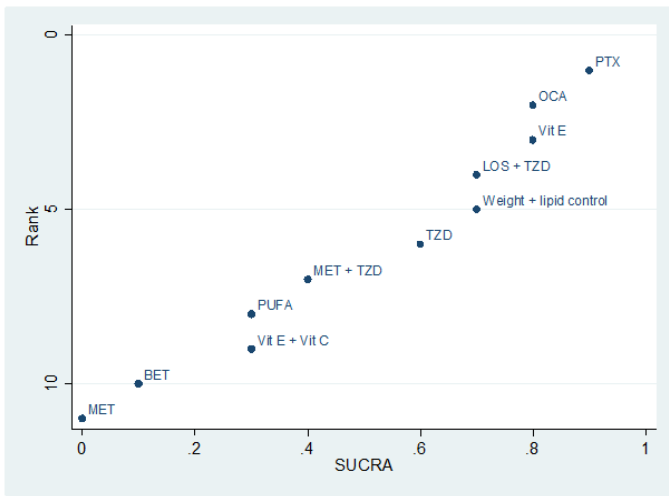

**C. NAFLD Activity score (NAS)**

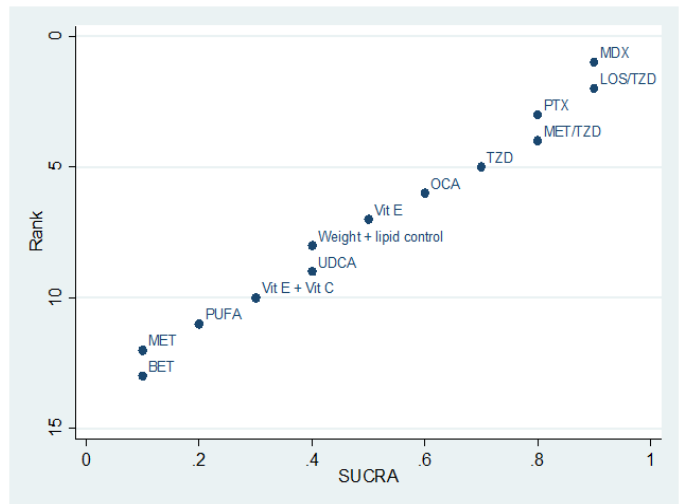

**D. Steatosis**

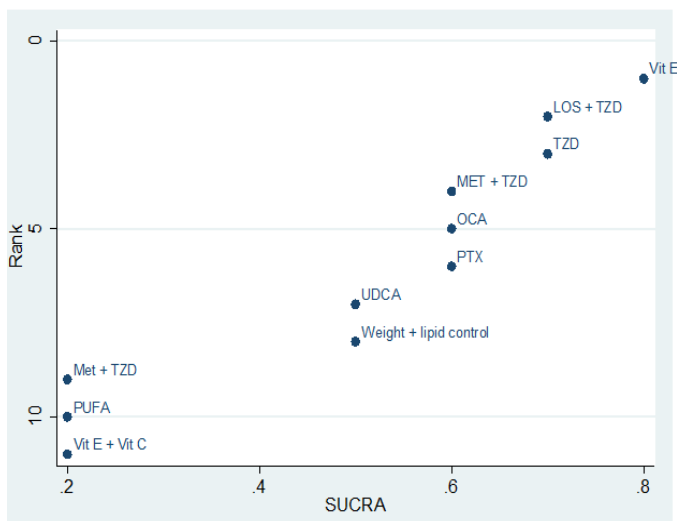

**E. Ballooning**

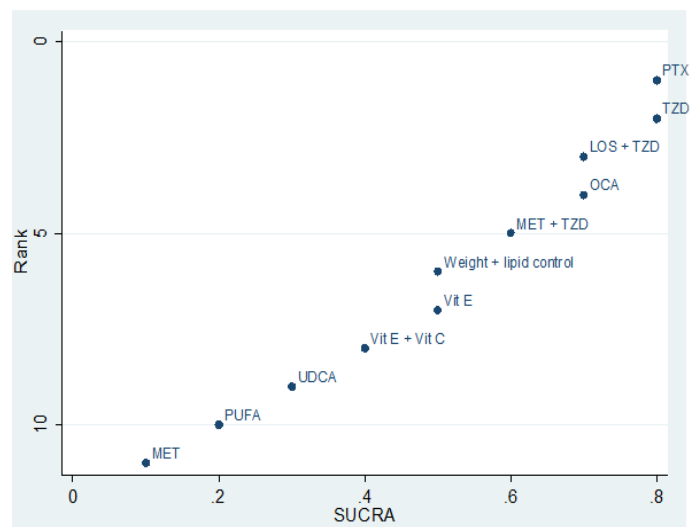

**F. Lobular inflammation**

**Appendix Figure 3.** Rank probability of interventions on improvement of histological outcomes (Rank vs. SUCRA); A. Fibrosis, B. Resolution of NASH (Non-alcoholic steatohepatitis); C. NAFLD Activity score (NAS), D. Steatosis, E. Ballooning degeneration, and F. Lobular inflammation

A. Fibrosis

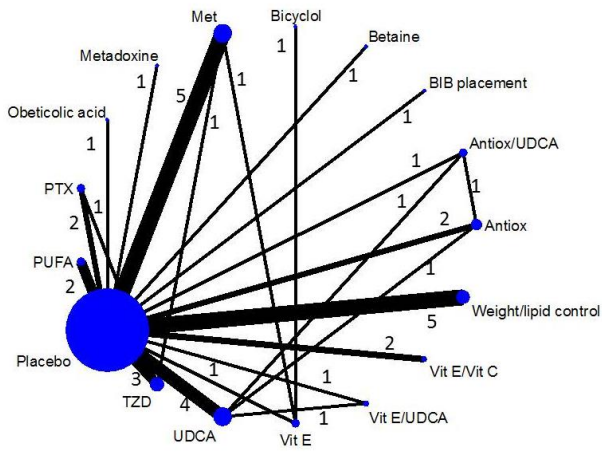

B. NAFLD Activity score (NAS)

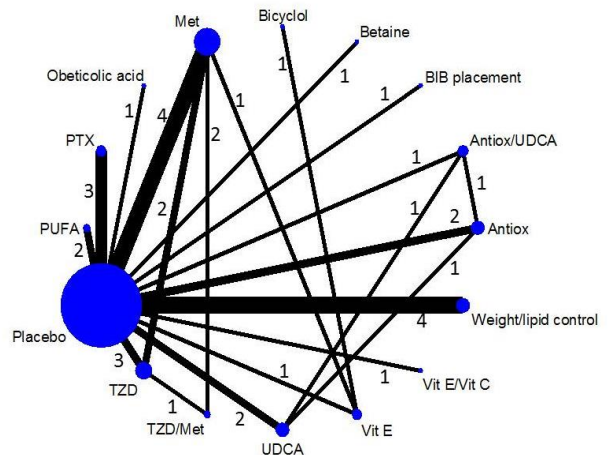

C. Steatosis

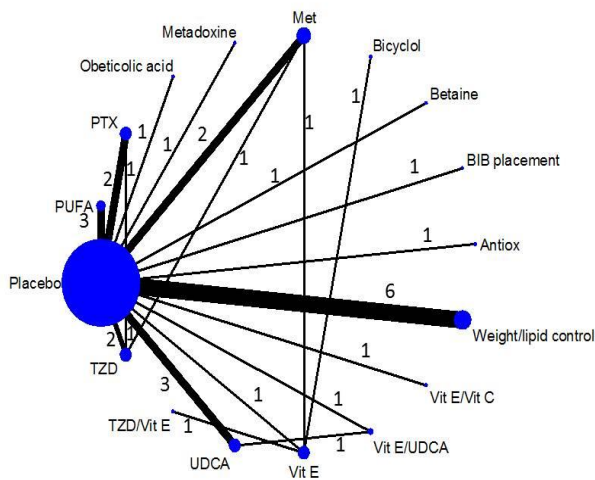

D. Ballooning

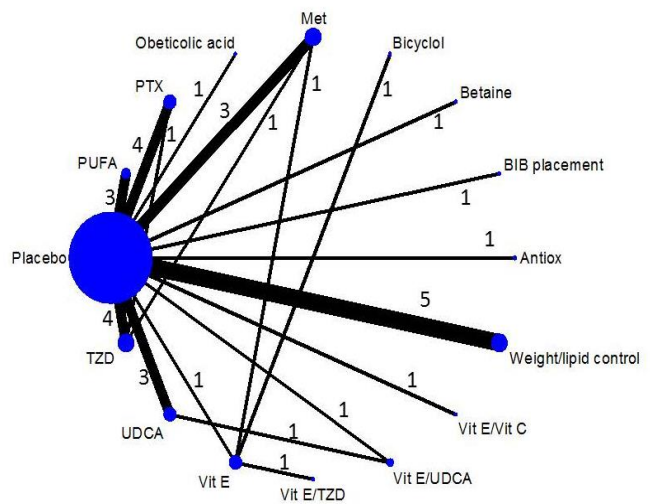

E. Lobular inflammation

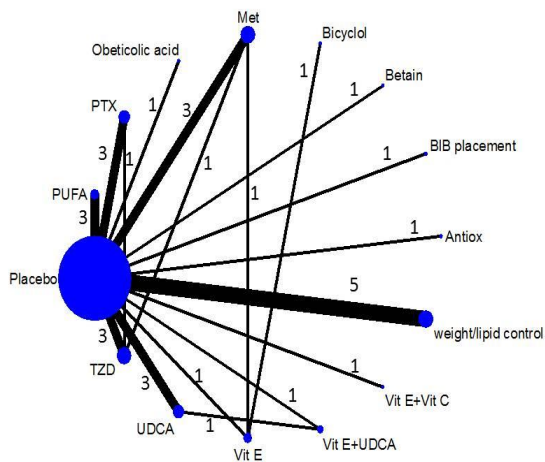

**Appendix Figure 4.** Network map for mean changes of histological outcomes; A. Fibrosis, B. NAFLD Activity score (NAS), C. Steatosis, D. Ballooning degeneration, and E. Inflammation.

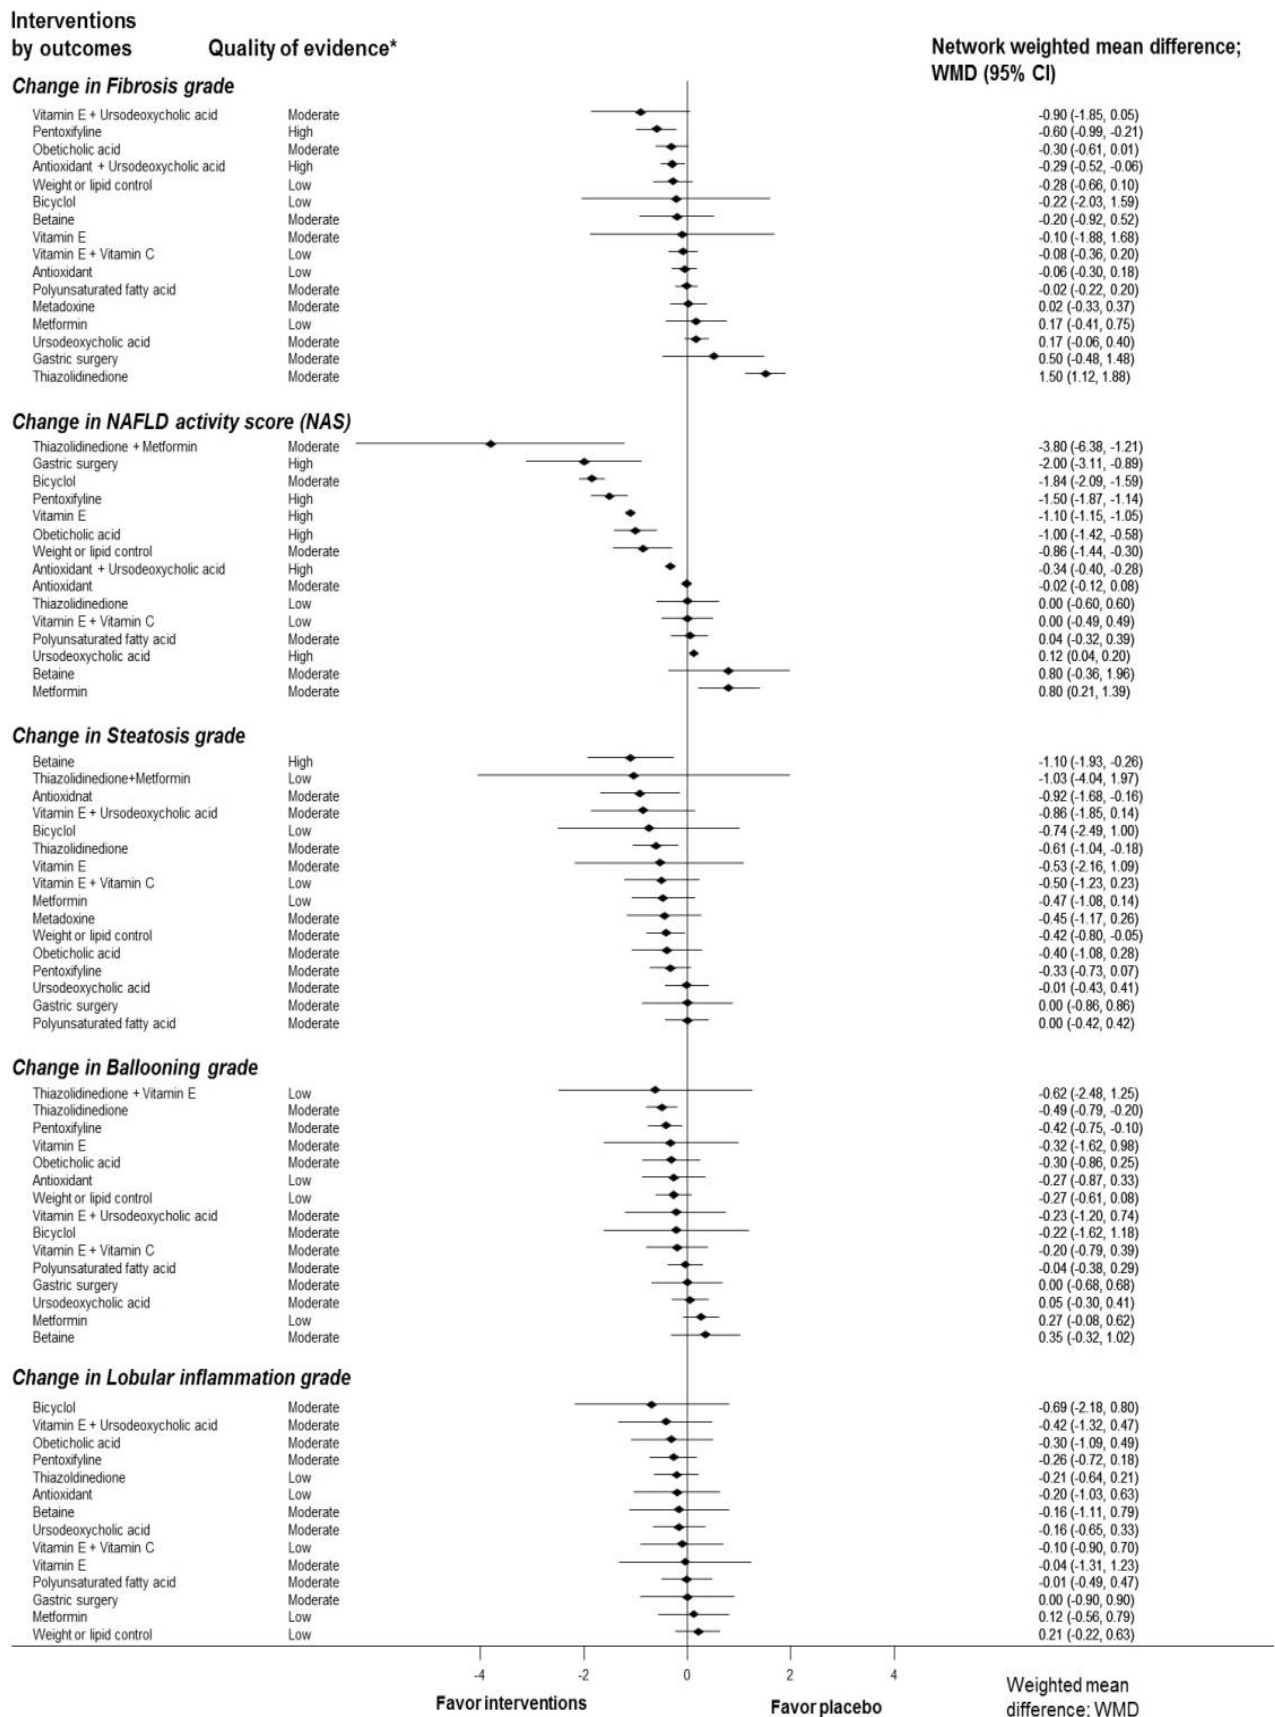

**Appendix Figure 5.** Summary of network estimates of interventions compared with placebo (co-intervention: advise of weight and diet control) on weighted mean difference (WMD) of histological outcomes; Please note that in the forest plot, ‘experimental’ refers to first treatment group, whereas ‘control’ refers to the second treatment group.

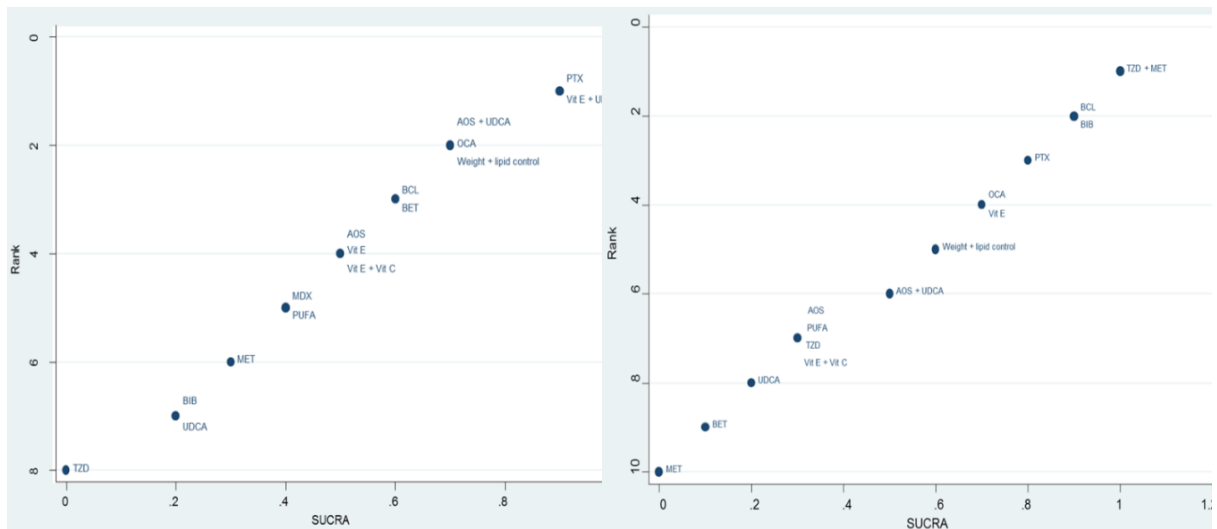

**A. Fibrosis**

**B. NAFLD Activity score (NAS)**

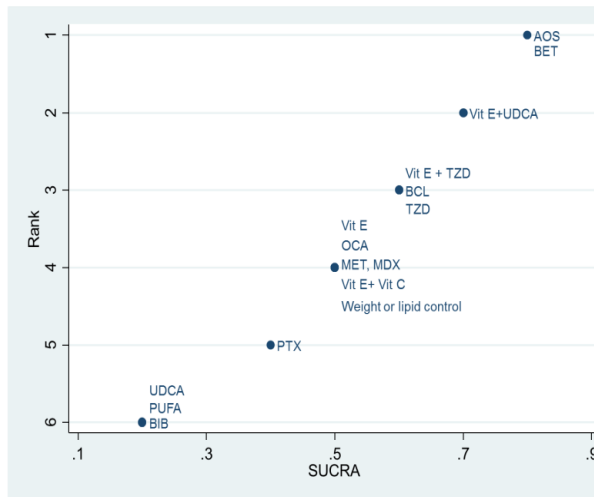

**C. Steatosis**

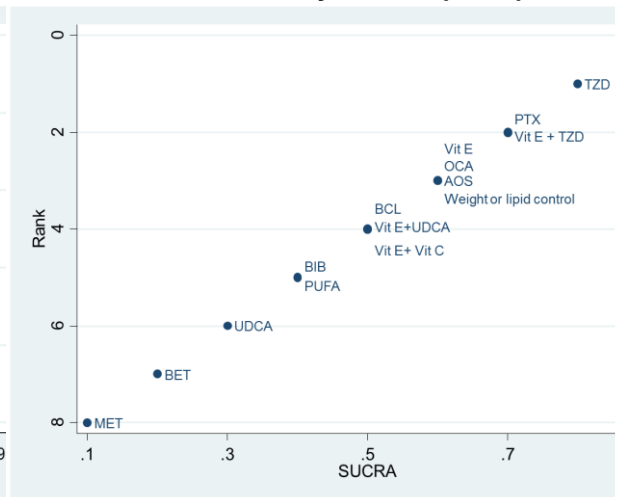

**D. Ballooning**

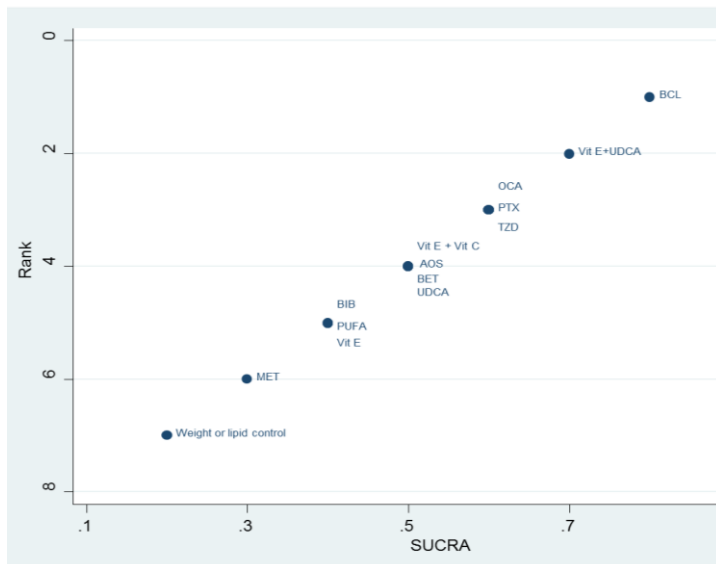

**E. Lobular inflammation**

**Appendix Figure 6.** Rank probability of interventions on mean change of histological outcomes (Rank vs. SUCRA); A. Fibrosis, B. NAFLD Activity score (NAS), C. Steatosis, D. Ballooning degeneration, and E. Lobular inflammation.

A. Fibrosis (all studies)

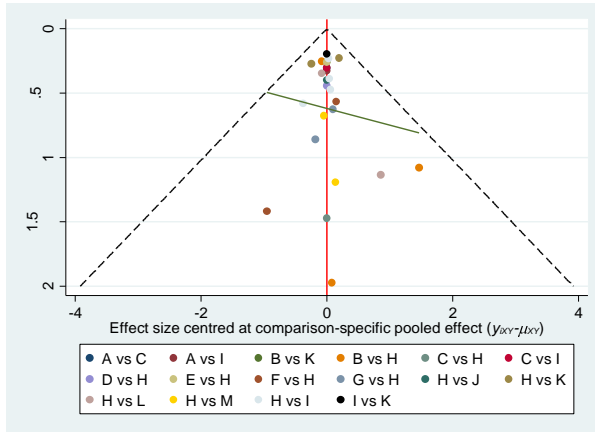

A. Fibrosis (after small studies omitted)

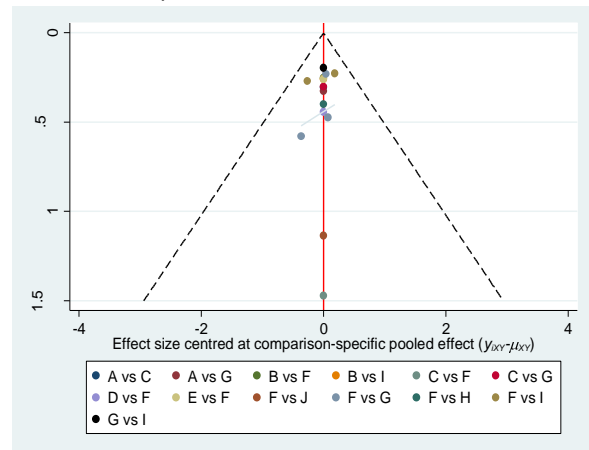

B. Resolution of NASH (all studies)

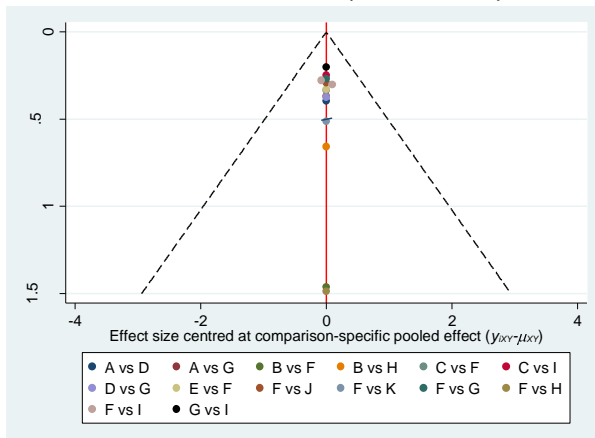

B. Resolution of NASH (after small studies omitted)

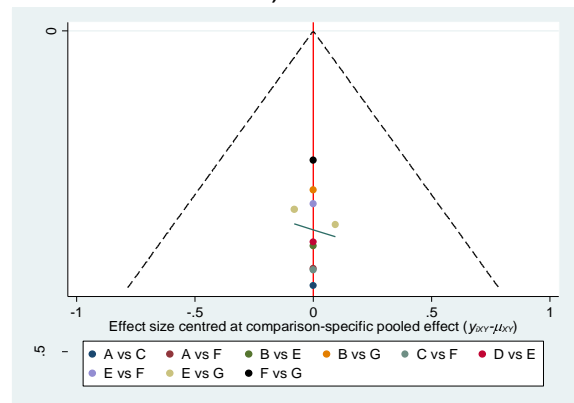

C. NAS (all studies)

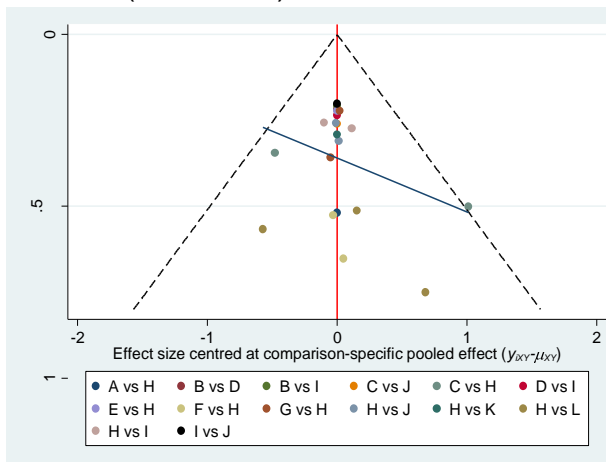

C. NAS (after small studies omitted)

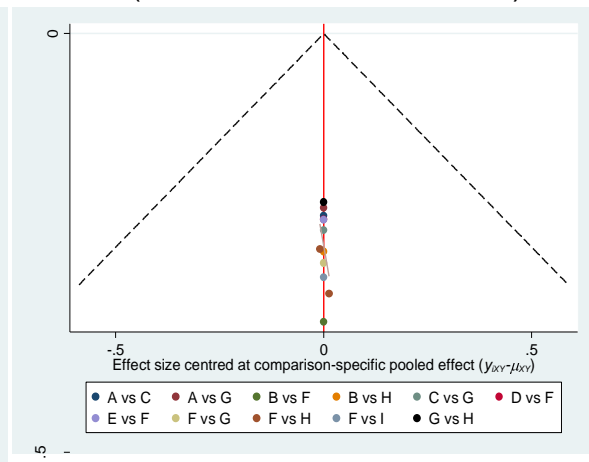

D. Steatosis (all studies)

D. Steatosis (after small studies omitted)



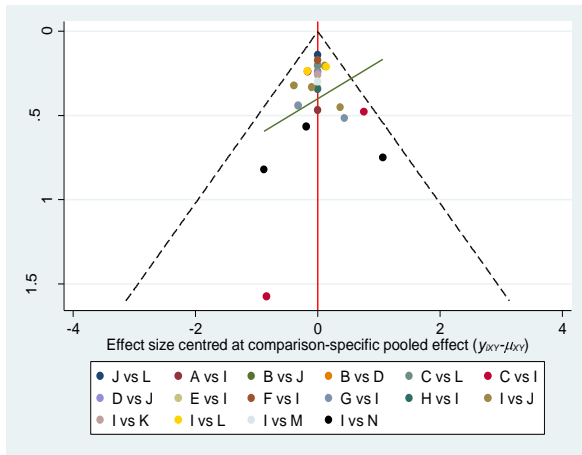

E. Ballooning (all studies)

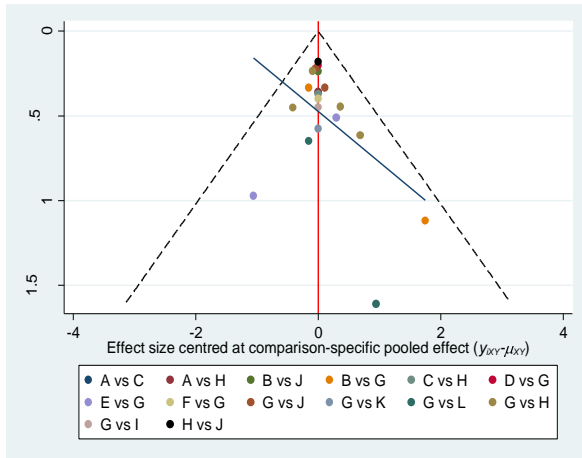

F. Lobular inflammation (all studies)

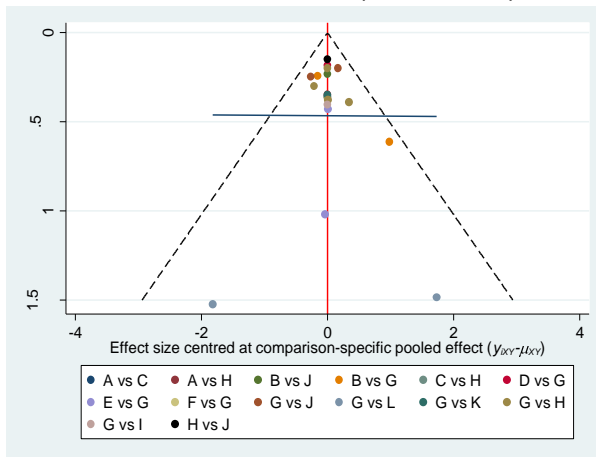

**Appendix Figure 7.** Comparison adjusted funnel plots of improvement outcomes in the network of interventions used for treatment NAFLD of all studies and after small studies was omitted; A. Fibrosis, B. Resolution of NASH, C. NAS, D. Steatosis, E. Ballooning, and F. Lobular inflammation

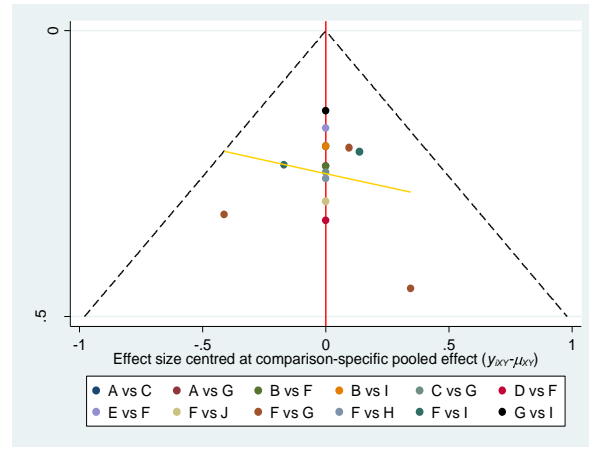

E. Ballooning (after small studies omitted)

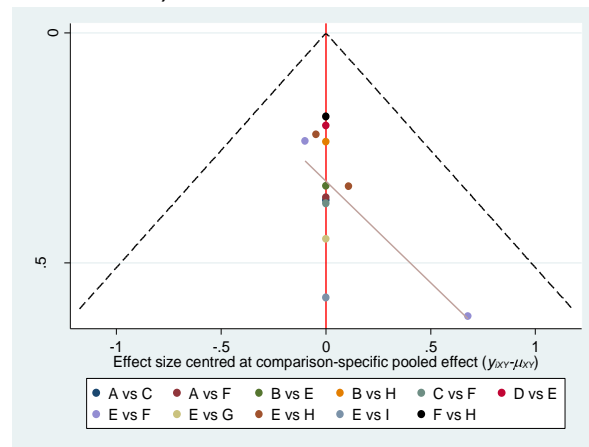

G. Lobular inflammation (after small studies omitted)

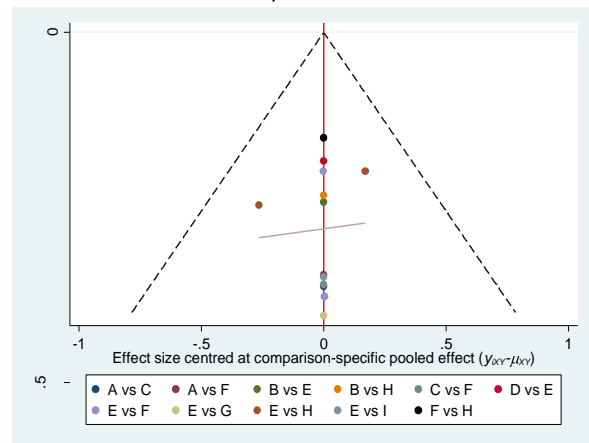

**Appendix Table 1. Example of searching**

| <b>Databases</b>                                                | <b>Key word and strategies</b>                                                                                                                                                                                                                                                                                                                                                                                                                                                                                                                                                                                                                                                                                                                                                                                                                                                                                       |
|-----------------------------------------------------------------|----------------------------------------------------------------------------------------------------------------------------------------------------------------------------------------------------------------------------------------------------------------------------------------------------------------------------------------------------------------------------------------------------------------------------------------------------------------------------------------------------------------------------------------------------------------------------------------------------------------------------------------------------------------------------------------------------------------------------------------------------------------------------------------------------------------------------------------------------------------------------------------------------------------------|
| <b>PubMed</b>                                                   | Non-alcoholic fatty liver disease Filters: Clinical Trials                                                                                                                                                                                                                                                                                                                                                                                                                                                                                                                                                                                                                                                                                                                                                                                                                                                           |
| <b>Cochrane Central Register of Controlled Trials (CENTRAL)</b> | <p>#1 Non-alcoholic fatty liver disease.mp. [mp=title, original title, abstract, mesh headings, heading words, keyword]</p> <p>#2 Fatty liver.mp. [mp=title, original title, abstract, mesh headings, heading words, keyword]</p> <p>#3 Clinical trial.mp. [mp=title, original title, abstract, mesh headings, heading words, keyword]</p> <p>#4 #1 or #2</p> <p>#5 #3 and #4</p>                                                                                                                                                                                                                                                                                                                                                                                                                                                                                                                                    |
| <b>EMBASE</b>                                                   | <p>1 Non-alcoholic fatty liver disease.mp. [mp=title, abstract, heading word, drug trade name, original title, device manufacturer, drug manufacturer, device trade name, keyword]</p> <p>2 Randomized controlled trial.mp. [mp=title, abstract, heading word, drug trade name, original title, device manufacturer, drug manufacturer, device trade name, keyword]</p> <p>3 RCT.mp. [mp=title, abstract, heading word, drug trade name, original title, device manufacturer, drug manufacturer, device trade name, keyword]</p> <p>4 Clinical trial.mp. [mp=title, abstract, heading word, drug trade name, original title, device manufacturer, drug manufacturer, device trade name, keyword]</p> <p>5 Clinical trials.mp. [mp=title, abstract, heading word, drug trade name, original title, device manufacturer, drug manufacturer, device trade name, keyword]</p> <p>6 2 or 3 or 4 or 5</p> <p>7 1 and 6</p> |

**Appendix Table 2. GRADE Working Group grades of evidence\***

| <b>Grading</b>   | <b>Meaning</b>                                                                                                                                                                         |
|------------------|----------------------------------------------------------------------------------------------------------------------------------------------------------------------------------------|
| High quality     | We are very confident that the true effect lies close to that of the estimate of the effect                                                                                            |
| Moderate quality | We are moderately confident in the effect estimate: The true effect is likely to be close to the estimate of the effect, but there is a possibility that it is substantially different |
| Low quality      | Our confidence in the effect estimate is limited: The true effect may be substantially different from the estimate of the effect                                                       |
| Very low quality | We have very little confidence in the effect estimate: The true effect is likely to be substantially different from the estimate of effect                                             |

---

\*The quality of evidence based on grading system can be rated down based on risk of bias (i.e., low risk, unclear, high risk), indirectness (i.e., measurement outcome such as death (direct outcome) or ALT level (indirect outcome)), imprecision (i.e., wide range of 95%CI), inconsistency (or heterogeneity) and/or publication bias, to levels of moderate, low and very low quality.

**Appendix Table 3.** Pairwise (direct) estimates effects of different interventions compared with placebo (co-intervention: advise of weight and diet control) on improvement of histological outcome (outcomes reported as risk ratio (RR) along with 95%CI in parenthesis) with quality of evidence

| Intervention                         | N (study) | Fibrosis                 | GRADE                      | N (study) | Resolution of NASH       | GRADE                      | N (study)      | NAS                      | GRADE                      | n (study) | Inflammation             | GRADE                      | n (study) | Ballooning               | GRADE                      | n (study) | Steatosis                | GRADE                      |
|--------------------------------------|-----------|--------------------------|----------------------------|-----------|--------------------------|----------------------------|----------------|--------------------------|----------------------------|-----------|--------------------------|----------------------------|-----------|--------------------------|----------------------------|-----------|--------------------------|----------------------------|
| <b>Placebo control</b>               |           |                          |                            |           |                          |                            |                |                          |                            |           |                          |                            |           |                          |                            |           |                          |                            |
| PTX                                  | 85 (2)    | 2.27 (0.81, 6.36)        | ⊕⊕⊕○ MODERATE <sup>1</sup> | N/A       | N/A                      | N/A                        | 85 (2)         | <b>2.70 (1.21, 6.03)</b> | ⊕⊕⊕○ MODERATE <sup>1</sup> | 83 (2)    | 2.06 (0.95, 4.48)        | ⊕⊕⊕○ MODERATE <sup>1</sup> | 85 (2)    | 1.73 (0.48, 6.24)        | ⊕⊕⊕○ MODERATE <sup>1</sup> | 85 (2)    | <b>2.40 (1.15, 5.03)</b> | ⊕⊕⊕○ MODERATE <sup>1</sup> |
| Weigh or lipid control               | 152 (3)   | 2.00 (0.68, 5.85)        | ⊕⊕⊕○ MODERATE <sup>1</sup> | 31 (1)    | 2.06 (0.76, 5.63)        | ⊕⊕○○ LOW <sup>1,2</sup>    | 131 (3)        | 1.77 (0.91, 3.44)        | ⊕⊕○○ LOW <sup>1,2</sup>    | 100 (2)   | 1.20 (0.04, 39.31)       | ⊕⊕○○ LOW <sup>1,3</sup>    | 100 (2)   | 1.17 (0.36, 3.79)        | ⊕⊕⊕○ MODERATE <sup>1</sup> | 152 (2)   | 1.22 (0.44, 3.37)        | ⊕⊕⊕○ MODERATE <sup>1</sup> |
| <b>Obeticholic acid</b>              | 283 (1)   | <b>1.91 (1.15, 3.16)</b> | ⊕⊕⊕⊕ HIGH                  | 283 (1)   | 1.70 (0.89, 3.25)        | ⊕⊕⊕○ MODERATE <sup>1</sup> | 183 (1)        | <b>2.19 (1.42, 3.28)</b> | ⊕⊕⊕⊕ HIGH                  | 283 (1)   | <b>1.60 (1.12, 2.29)</b> | ⊕⊕⊕⊕ HIGH                  | 283 (1)   | <b>1.58 (1.06, 2.34)</b> | ⊕⊕⊕⊕ HIGH                  | 283 (1)   | <b>1.69 (1.21, 2.36)</b> | ⊕⊕⊕⊕ HIGH                  |
| <b>TZD</b>                           | 354 (4)   | <b>1.42 (1.01, 1.99)</b> | ⊕⊕⊕⊕ HIGH                  | 163 (1)   | <b>2.28 (1.35, 3.87)</b> | ⊕⊕⊕⊕ HIGH                  | 226 (2)        | <b>1.56 (1.08, 2.26)</b> | ⊕⊕⊕⊕ HIGH                  | 354 (4)   | <b>1.74 (1.32, 2.29)</b> | ⊕⊕⊕⊕ HIGH                  | 354 (1)   | 1.53 (0.97, 2.43)        | ⊕⊕⊕○ MODERATE <sup>1</sup> | 354 (4)   | <b>2.01 (1.52, 2.67)</b> | ⊕⊕⊕⊕ HIGH                  |
| Metadoxine                           | 134 (1)   | 1.35 (0.57, 3.21)        | ⊕⊕⊕○ MODERATE <sup>1</sup> | N/A       | N/A                      | N/A                        | N/A            | N/A                      | N/A                        | N/A       | N/A                      | N/A                        | N/A       | N/A                      | N/A                        | 134 (1)   | <b>2.97 (1.55, 5.70)</b> | ⊕⊕⊕⊕ HIGH                  |
| Vit E                                | 283 (2)   | 1.21 (0.79, 1.88)        | ⊕⊕⊕○ MODERATE <sup>1</sup> | 267 (2)   | <b>2.07 (1.39, 3.09)</b> | ⊕⊕⊕⊕ HIGH                  | <b>283 (2)</b> | <b>2.24 (1.52, 3.31)</b> | ⊕⊕⊕⊕ HIGH                  | 167 (1)   | <b>1.70 (1.15, 2.51)</b> | ⊕⊕⊕⊕ HIGH                  | 283 (2)   | <b>1.97 (1.38, 2.83)</b> | ⊕⊕⊕⊕ HIGH                  | 283 (2)   | <b>1.68 (1.24, 2.29)</b> | ⊕⊕⊕⊕ HIGH                  |
| UDCA                                 | 166 (1)   | 0.90 (0.41, 1.96)        | ⊕⊕⊕○ MODERATE <sup>1</sup> | N/A       | N/A                      | N/A                        | N/A            | N/A                      | N/A                        | 166 (1)   | 0.74 (0.34, 1.65)        | ⊕⊕⊕○ MODERATE <sup>1</sup> | 166 (1)   | 1.34 (0.56, 3.23)        | ⊕⊕⊕○ MODERATE <sup>1</sup> | 166 (1)   | 1.18 (0.71, 1.96)        | ⊕⊕⊕○ MODERATE <sup>1</sup> |
| Met                                  | 197 (3)   | 0.76 (0.19, 3.07)        | ⊕⊕○○ LOW <sup>1,2</sup>    | 97 (1)    | 1.55 (0.80, 2.98)        | ⊕⊕⊕○ MODERATE <sup>1</sup> | 163 (2)        | 0.73 (0.17, 3.16)        | ⊕⊕○○ LOW <sup>1,2</sup>    | 163 (2)   | 0.76 (0.25, 2.27)        | ⊕⊕○○ LOW <sup>1,2</sup>    | 163 (2)   | 1.16 (0.19, 6.94)        | ⊕⊕○○ LOW <sup>1,3</sup>    | 182 (3)   | 1.05 (0.51, 2.16)        | ⊕⊕⊕○ MODERATE <sup>1</sup> |
| PUFA                                 | 78 (2)    | 0.58 (0.22, 1.57)        | ⊕⊕⊕○ MODERATE <sup>1</sup> | N/A       | N/A                      | N/A                        | 280 (2)        | 0.89 (0.61, 1.29)        | ⊕⊕⊕○ MODERATE <sup>1</sup> | 37 (1)    | 0.74 (0.36, 1.52)        | ⊕⊕⊕○ MODERATE <sup>1</sup> | 37 (1)    | 0.63 (0.29, 1.38)        | ⊕⊕⊕○ MODERATE <sup>1</sup> | 37 (1)    | 0.84 (0.43, 1.65)        | ⊕⊕⊕○ MODERATE <sup>1</sup> |
| Betaine                              | N/A       | N/A                      | N/A                        | N/A       | N/A                      | N/A                        | 55 (1)         | 0.38 (0.14, 1.04)        | ⊕⊕⊕○ MODERATE <sup>1</sup> | N/A       | N/A                      | N/A                        | N/A       | N/A                      | N/A                        | 55 (1)    | 0.47 (0.19, 1.18)        | ⊕⊕⊕○ MODERATE <sup>1</sup> |
| TZD +Met                             | 74 (1)    | 4.68 (0.26, 83.63)       | ⊕⊕○○ LOW <sup>1,2</sup>    | N/A       | N/A                      | N/A                        | N/A            | N/A                      | N/A                        | N/A       | N/A                      | N/A                        | N/A       | N/A                      | N/A                        | N/A       | N/A                      | N/A                        |
| Vit E + Vit C                        | 139 (2)   | 1.27 (0.66, 2.44)        | ⊕⊕○○ LOW <sup>1,2</sup>    | 90 (1)    | 0.94 (0.53, 1.66)        | ⊕⊕○○ LOW <sup>1,2</sup>    | 90 (1)         | 0.94 (0.53, 1.66)        | ⊕⊕○○ LOW <sup>1,2</sup>    | 90 (1)    | 1.00 (0.50, 1.98)        | ⊕⊕○○ LOW <sup>1,2</sup>    | 90 (1)    | 0.50 (0.16, 1.54)        | ⊕⊕○○ LOW <sup>1,2</sup>    | 90 (1)    | 1.00 (0.56, 1.79)        | ⊕⊕○○ LOW <sup>1,2</sup>    |
| MEL + PP                             | N/A       | N/A                      | N/A                        | 46 (1)    | 9.00 (0.51, 158.17)      | ⊕⊕○○ LOW <sup>1</sup> N/A  | N/A            | N/A                      | N/A                        | N/A       | N/A                      | N/A                        | N/A       | N/A                      | N/A                        | N/A       | N/A                      | N/A                        |
| TRP +PP                              | N/A       | N/A                      | N/A                        | 51 (1)    | 5.79 (0.31, 106.71)      | ⊕⊕○○ LOW <sup>1</sup> N/A  | N/A            | N/A                      | N/A                        | N/A       | N/A                      | N/A                        | N/A       | N/A                      | N/A                        | N/A       | N/A                      | N/A                        |
| <b>Active controls (comparators)</b> |           |                          |                            |           |                          |                            |                |                          |                            |           |                          |                            |           |                          |                            |           |                          |                            |

| Intervention              | N (study) | Fibrosis          | GRADE                      | N (study) | Resolution of NASH | GRADE                      | N (study) | NAS               | GRADE                      | n (study) | Inflammation      | GRADE                      | n (study) | Ballooning        | GRADE                      | n (study) | Steatosis         | GRADE                      |
|---------------------------|-----------|-------------------|----------------------------|-----------|--------------------|----------------------------|-----------|-------------------|----------------------------|-----------|-------------------|----------------------------|-----------|-------------------|----------------------------|-----------|-------------------|----------------------------|
| Vit E (vs. TZD)           | 164 (1)   | 1.01 (0.69, 1.49) | ⊕⊕⊕○ MODERATE <sup>1</sup> | 164 (1)   | 0.84 (0.56, 1.23)  | ⊕⊕⊕○ MODERATE <sup>1</sup> | 164 (1)   | 1.27 (0.86, 2.34) | ⊕⊕⊕○ MODERATE <sup>1</sup> | 164 (1)   | 0.97 (0.72, 1.32) | ⊕⊕⊕○ MODERATE <sup>1</sup> | 164 (1)   | 1.23 (0.86, 1.75) | ⊕⊕⊕○ MODERATE <sup>1</sup> | 164 (1)   | 0.85 (0.65, 1.12) | ⊕⊕⊕○ MODERATE <sup>1</sup> |
| Vit E (vs. Met)           | 115 (1)   | 0.80 (0.49, 1.33) | ⊕⊕⊕○ MODERATE <sup>1</sup> | 97 (1)    | 1.47 (0.90, 2.38)  | ⊕⊕⊕○ MODERATE <sup>1</sup> | 115 (1)   | 1.54 (0.92, 2.56) | ⊕⊕⊕○ MODERATE <sup>1</sup> | 115 (1)   | 0.94 (0.60, 1.49) | ⊕⊕⊕○ MODERATE <sup>1</sup> | 115 (1)   | 0.98 (0.62, 1.56) | ⊕⊕⊕○ MODERATE <sup>1</sup> | 115 (1)   | 1.02 (0.68, 1.52) | ⊕⊕⊕○ MODERATE <sup>1</sup> |
| TZD + LOS (vs. TZD)       | 86 (1)    | 0.91 (0.48, 1.73) | ⊕⊕○○ LOW <sup>1 2</sup>    | 86 (1)    | 0.76 (0.37, 1.57)  | ⊕⊕○○ LOW <sup>1 2</sup>    | 86 (1)    | 1.14 (0.76, 1.71) | ⊕⊕○○ LOW <sup>1 2</sup>    | 86 (1)    | 0.91 (0.46, 1.80) | ⊕⊕○○ LOW <sup>1 2</sup>    | 86 (1)    | 0.99 (0.49, 2.00) | ⊕⊕⊕○ MODERATE <sup>2</sup> | 86 (1)    | 1.42 (0.90, 2.26) | ⊕⊕○○ LOW <sup>1 2</sup>    |
| TZD + Met (vs. TZD)       | 90 (1)    | 1.09 (0.61, 1.98) | ⊕⊕○○ LOW <sup>1 2</sup>    | 90 (1)    | 0.70 (0.34, 1.45)  | ⊕⊕○○ LOW <sup>1 2</sup>    | 90 (1)    | 0.84 (0.53, 1.33) | ⊕⊕○○ LOW <sup>1 2</sup>    | 90 (1)    | 0.77 (0.38, 1.55) | ⊕⊕⊕○ MODERATE <sup>1</sup> | 90 (1)    | 0.84 (0.41, 1.73) | ⊕⊕⊕○ MODERATE <sup>1</sup> | 90 (1)    | 1.20 (0.74, 1.95) | ⊕⊕○○ LOW <sup>1 2</sup>    |
| TZD + Met (vs. TZD + LOS) | 94 (1)    | 1.20 (0.66, 1.98) | ⊕⊕○○ LOW <sup>1 2</sup>    | 94 (1)    | 0.92 (0.42, 2.00)  | ⊕⊕○○ LOW <sup>1 2</sup>    | 94 (1)    | 0.73 (0.48, 1.13) | ⊕⊕○○ LOW <sup>1 2</sup>    | 94 (1)    | 0.84 (0.41, 1.71) | ⊕⊕○○ LOW <sup>1 2</sup>    | 94 (1)    | 0.84 (0.41, 1.71) | ⊕⊕○○ LOW <sup>1 2</sup>    | 94 (1)    | 0.84 (0.57, 1.26) | ⊕⊕○○ LOW <sup>1 2</sup>    |

**Note:** CI = Confidence interval, RR = Risk ratios, GRADE = Levels of quality of evidence using GRADE system approach, Reason for grading; 1. Wide range of 95% CI, 2. At least 1 study has high risk of bias, 3. There is evidence of inconsistency.

**Appendix Table 4.** League table presenting network meta-analysis estimates (lower triangle) and direct estimates (upper triangle) for improvement of NAS of interventions for NAFLD

|                             |                              |                              |                              |                              |                              |                      |                              |                              |                      |                      |                              |
|-----------------------------|------------------------------|------------------------------|------------------------------|------------------------------|------------------------------|----------------------|------------------------------|------------------------------|----------------------|----------------------|------------------------------|
| Vitamin E + Vitamin C       | -                            | -                            | -                            | -                            | -                            | -                    | -                            | -                            | -                    | -                    | 0.94<br>(0.53, 1.66)         |
| 0.74<br>(0.33,1.67)         | TZD + Met                    | 0.73<br>(0.48, 1.13)         | -                            | -                            | 0.84<br>(0.53, 1.33)         | -                    | -                            | -                            | -                    | -                    | -                            |
| 0.55<br>(0.25,1.19)         | 0.73<br>(0.48,1.13)          | TZD + LOS                    | -                            | -                            | 1.14<br>(0.76, 1.71)         | -                    | -                            | -                            | -                    | -                    | -                            |
| 0.53<br>(0.22,1.27)         | 0.71<br>(0.30,1.71)          | 0.97<br>(0.41,2.27)          | Weight or lipid control      | -                            | -                            | -                    | -                            | -                            | -                    | -                    | 1.77<br>(0.91, 3.44)         |
| <b>0.49<br/>(0.25,0.95)</b> | 0.66<br>(0.37,1.17)          | 0.90<br>(0.53,1.53)          | 0.93<br>(0.44,1.95)          | Vitamin E                    | 1.27<br>(0.86, 2.34)         | -                    | -                            | -                            | 1.54<br>(0.92, 2.56) | -                    | <b>2.24<br/>(1.52, 3.31)</b> |
| 0.62<br>(0.32,1.21)         | 0.84<br>(0.53,1.33)          | 1.14<br>(0.76,1.71)          | 0.93<br>(0.44,1.95)          | 1.27<br>(0.90,1.80)          | TZD                          | -                    | -                            | -                            | -                    | -                    | <b>1.56<br/>(1.08, 2.26)</b> |
| 1.05<br>(0.53,2.08)         | 1.42<br>(0.72,2.81)          | <b>1.93<br/>(1.01,3.69)</b>  | 1.18<br>(0.56,2.48)          | <b>2.15<br/>(1.30,3.55)</b>  | <b>1.69<br/>(1.02,2.81)</b>  | PUFA                 | -                            | -                            | -                    | -                    | -                            |
| <b>0.35<br/>(0.13,0.93)</b> | 0.47<br>(0.17,1.25)          | 0.64<br>(0.24,1.67)          | 1.99<br>(0.93,4.26)          | 0.71<br>(0.30,1.69)          | 0.56<br>(0.23,1.34)          | 0.33<br>(0.14,0.80)  | PTX                          | -                            | -                    | -                    | <b>2.70<br/>(1.21, 6.03)</b> |
| <b>0.43<br/>(0.21,0.88)</b> | 0.58<br>(0.28,1.19)          | 0.78<br>(0.39,1.56)          | 0.66<br>(0.23,1.86)          | 0.87<br>(0.50,1.52)          | 0.69<br>(0.40,1.20)          | 0.41<br>(0.23,0.72)  | 1.23<br>(0.50,3.07)          | OCA                          | -                    | -                    | <b>2.19 (1.42, 3.28)</b>     |
| 0.95<br>(0.45,2.00)         | 1.28<br>(0.63,2.58)          | 1.74<br>(0.89,3.40)          | 0.81<br>(0.37,1.79)          | 1.93<br>(1.22,3.06)          | 1.52<br>(0.89,2.60)          | 0.90<br>(0.49,1.66)  | <b>2.73<br/>(1.07,6.97)</b>  | <b>2.21<br/>(1.15,4.25)</b>  | Met                  | -                    | 0.73<br>(0.17, 3.16)         |
| 2.49<br>(0.78,7.96)         | <b>3.35<br/>(1.04,10.74)</b> | <b>4.55<br/>(1.45,14.34)</b> | <b>4.70<br/>(1.40,15.81)</b> | 5.07<br>(1.74,14.80)         | <b>4.00<br/>(1.37,11.68)</b> | 2.36<br>(0.80,6.95)  | <b>7.16<br/>(1.96,26.12)</b> | <b>5.81<br/>(1.92,17.52)</b> | 2.62<br>(0.85,8.08)  | Betaine              | 0.38<br>(0.14, 1.04)         |
| 0.94<br>(0.53, 1.66)        | 1.26<br>(0.71, 2.24)         | <b>1.72<br/>(1.01, 2.93)</b> | 1.78<br>(0.91, 3.44)         | <b>1.91<br/>(1.36, 2.69)</b> | <b>1.51<br/>(1.07, 2.13)</b> | 0.89<br>(0.61, 1.29) | <b>2.7<br/>(1.21, 6.02)</b>  | <b>2.19<br/>(1.42, 3.38)</b> | 0.99<br>(0.61, 1.61) | 0.38<br>(0.14, 1.04) | Placebo                      |

**Appendix Table 5.** Pairwise (direct) estimates effects of different interventions compared with comparators (co-intervention: advise of weight and diet control) on mean difference of histological outcomes (outcomes reported as Weighted Mean Difference (WMD) along with 95%CI in parenthesis)

| Intervention             | N (study) | Fibrosis                    | GRADE                        | N (study)      | NAS                         | GRADE                        | n (study) | Inflammation                | GRADE                        | n (study)      | Balloonin g                 | GRADE                        | n (study)      | Steatosis                   | GRADE                        |
|--------------------------|-----------|-----------------------------|------------------------------|----------------|-----------------------------|------------------------------|-----------|-----------------------------|------------------------------|----------------|-----------------------------|------------------------------|----------------|-----------------------------|------------------------------|
| <b>Placebo control</b>   |           |                             |                              |                |                             |                              |           |                             |                              |                |                             |                              |                |                             |                              |
| PTX                      | 85 (2)    | <b>-0.60 (-0.95, -0.25)</b> | ⊕⊕⊕⊕ HIGH                    | 108 (3)        | <b>-1.50 (-1.87, -1.14)</b> | ⊕⊕⊕⊕ HIGH                    | 108 (3)   | <b>-0.50 (-0.72, -0.27)</b> | ⊕⊕⊕⊕ HIGH                    | 148 (4)        | -0.31 (-0.76, 0.14)         | ⊕○○○ VERY LOW <sup>123</sup> | N/A            | N/A                         | N/A                          |
| OCA                      | 283 (1)   | <b>-0.30 (-0.52, -0.08)</b> | ⊕⊕⊕⊕ HIGH                    | 283 (1)        | <b>-1.00 (-1.42, -0.58)</b> | ⊕⊕⊕⊕ HIGH                    | 283 (1)   | <b>-0.30 (-0.50, -0.10)</b> | ⊕⊕⊕⊕ HIGH                    | 283 (1)        | <b>-0.30 (-0.51, -0.09)</b> | ⊕⊕⊕⊕ HIGH                    | 283 (1)        | <b>-0.40 (-0.61, -0.19)</b> | ⊕⊕⊕⊕ HIGH                    |
| Betaine                  | 55 (1)    | -0.20 (-0.88, 0.48)         | ⊕⊕⊕○ MODERATE <sup>1</sup>   | 55 (1)         | 0.80 (-0.36, 1.96)          | ⊕⊕⊕○ MODERATE <sup>1</sup>   | 55 (1)    | -0.16 (-0.72, 0.40)         | ⊕⊕⊕○ MODERATE <sup>1</sup>   | 55 (1)         | 0.35 (-0.08, 0.78)          | ⊕⊕⊕○ MODERATE <sup>1</sup>   | <b>55 (1)</b>  | <b>-1.10 (-1.63, -0.57)</b> | ⊕⊕⊕⊕ HIGH                    |
| BIB                      | 21 (1)    | 0.50 (-0.46, 1.46)          | ⊕⊕⊕○ MODERATE <sup>1</sup>   | 21 (1)         | <b>-2.00 (-3.11, -0.89)</b> | ⊕⊕⊕⊕ HIGH                    | 21 (1)    | NA                          | N/A                          | 21 (1)         | NA                          | N/A                          | N/A            | N/A                         | N/A                          |
| Vitamin E                | 116 (1)   | -0.10 (-1.87, 1.67)         | ⊕⊕⊕○ MODERATE <sup>1</sup>   | 116 (1)        | <b>-1.10 (-1.15, -1.05)</b> | ⊕⊕⊕⊕ HIGH                    | 116 (1)   | -0.10 (-1.33, 1.33)         | ⊕⊕⊕○ MODERATE <sup>1</sup>   | 116 (1)        | -0.60 (-1.96, 0.76)         | ⊕⊕⊕○ MODERATE <sup>1</sup>   | 116 (1)        | -0.40 (-2.17, 1.37)         | ⊕⊕⊕○ MODERATE <sup>1</sup>   |
| Antiox                   | 161 (2)   | -0.09 (-0.18, 0.01)         | ⊕⊕○○ LOW <sup>12</sup>       | 161 (2)        | -0.69 (-2.03, 0.65)         | ⊕⊕○○ LOW <sup>12</sup>       | 60 (1)    | -0.20 (-0.50, 0.10)         | ⊕⊕○○ LOW <sup>12</sup>       | 60 (1)         | -0.27 (-0.58, 0.04)         | ⊕⊕○○ LOW <sup>12</sup>       | <b>60 (1)</b>  | <b>-0.92 (-1.33, -0.51)</b> | ⊕⊕⊕○ MODERATE <sup>2</sup>   |
| PUFA                     | 340 (3)   | -0.04 (-0.38, 0.29)         | ⊕⊕⊕○ MODERATE <sup>1</sup>   | 303 (2)        | 0.04 (-0.32, 0.39)          | ⊕⊕⊕○ MODERATE <sup>1</sup>   | 340 (3)   | -0.01 (-0.41, 0.38)         | ⊕⊕○○ LOW <sup>13</sup>       | 240 (3)        | -0.05 (-0.31, 0.20)         | ⊕⊕⊕○ MODERATE <sup>1</sup>   | N/A            | N/A                         | N/A                          |
| Met                      | 236 (5)   | 0.41 (0.14, 0.68)           | ⊕⊕⊕○ MODERATE <sup>2</sup>   | 231 (4)        | 0.53 (-0.40, 1.47)          | ⊕○○○ VERY LOW <sup>123</sup> | 183 (3)   | 0.47 (0.15, 0.79)           | ⊕⊕⊕○ MODERATE <sup>2</sup>   | 183 (3)        | 0.22 (-0.18, 0.61)          | ⊕○○○ VERY LOW <sup>123</sup> | 183 (3)        | <b>-0.47 (-0.79, -0.15)</b> | ⊕⊕⊕○ MODERATE <sup>2</sup>   |
| TZD                      | 167 (3)   | 0.40 (-0.99, 1.79)          | ⊕○○○ VERY LOW <sup>123</sup> | 113 (2)        | 0.03 (-0.29, 0.35)          | ⊕⊕○○ LOW <sup>12</sup>       | 167 (3)   | -0.00 (-0.65, 0.64)         | ⊕○○○ VERY LOW <sup>123</sup> | <b>207 (4)</b> | <b>-0.31 (-0.56, -0.07)</b> | ⊕⊕○○ LOW <sup>23</sup>       | <b>104 (2)</b> | <b>-0.66 (-0.82, -0.50)</b> | ⊕⊕⊕○ MODERATE <sup>2</sup>   |
| Weight and lipid control | 237 (5)   | 0.20 (-0.26, 0.66)          | ⊕⊕○○ LOW <sup>12</sup>       | <b>163 (4)</b> | <b>-0.87 (-1.44, -0.30)</b> | ⊕⊕⊕○ MODERATE <sup>2</sup>   | 237 (5)   | 0.20 (-0.26, 0.66)          | ⊕○○○ VERY LOW <sup>123</sup> | 237 (5)        | -0.22 (-0.71, 0.27)         | ⊕○○○ VERY LOW <sup>123</sup> | 253 (6)        | -0.38 (-0.95, 0.20)         | ⊕○○○ VERY LOW <sup>123</sup> |
| UDCA                     | 477 (4)   | <b>0.14 (0.07, 0.21)</b>    | ⊕⊕⊕⊕ HIGH                    | 178 (2)        | -0.02 (-0.26, 0.30)         | ⊕⊕○○ LOW <sup>13</sup>       | 384 (3)   | -0.16 (-0.48, 0.17)         | ⊕⊕○○ LOW <sup>13</sup>       | 348 (3)        | 0.09 (-0.03, 0.21)          | ⊕⊕⊕○ MODERATE <sup>1</sup>   | 348 (3)        | -0.03 (-0.17, 0.10)         | ⊕⊕⊕○ MODERATE <sup>1</sup>   |
| Metadoxine               | 134 (1)   | 0.02 (-0.26, 0.30)          | ⊕⊕⊕○ MODERATE <sup>1</sup>   | N/A            | N/A                         | N/A                          | N/A       | N/A                         | N/A                          | N/A            | N/A                         | N/A                          | 134 (1)        | <b>-0.45 (-0.77, -0.13)</b> | ⊕⊕⊕⊕ HIGH                    |
| Antiox + UDCA            | 100 (1)   | <b>-0.29 (-0.35, -0.23)</b> | ⊕⊕⊕⊕ HIGH                    | 100 (1)        | <b>-0.34 (-0.40, -0.28)</b> | ⊕⊕⊕⊕ HIGH                    | N/A       | N/A                         | N/A                          | N/A            | N/A                         | N/A                          | N/A            | N/A                         | N/A                          |

|                                            |                |                             |                            |                |                             |                        |         |                             |                            |         |                     |                            |         |                             |                            |
|--------------------------------------------|----------------|-----------------------------|----------------------------|----------------|-----------------------------|------------------------|---------|-----------------------------|----------------------------|---------|---------------------|----------------------------|---------|-----------------------------|----------------------------|
| Vitamin E + Vitamin C                      | 139 (2)        | -0.09 (-0.29, 0.11)         | ⊕⊕○○ LOW <sup>12</sup>     | 90 (1)         | 0.00 (-0.49, 0.49)          | ⊕⊕○○ LOW <sup>12</sup> | 90 (1)  | -0.10 (-0.31, 0.11)         | ⊕⊕○○ LOW <sup>12</sup>     | 90 (1)  | -0.20 (-0.49, 0.09) | ⊕⊕○○ LOW <sup>12</sup>     | 90 (1)  | <b>-0.50 (-0.86, -0.14)</b> | ⊕⊕⊕○ MODERATE <sup>2</sup> |
| Vitamin E + UDCA                           | 30 (1)         | -0.90 (-1.82, 0.02)         | ⊕⊕⊕○ MODERATE <sup>1</sup> | N/A            | N/A                         | N/A                    | 30 (1)  | -0.50 (-1.15, 0.15)         | ⊕⊕⊕○ MODERATE <sup>1</sup> | 30 (1)  | -0.40 (-1.38, 0.58) | ⊕⊕⊕○ MODERATE <sup>1</sup> | 30 (1)  | -0.80 (-1.67, 0.07)         | ⊕⊕⊕○ MODERATE <sup>1</sup> |
| <b>Interventions (vs. active controls)</b> |                |                             |                            |                |                             |                        |         |                             |                            |         |                     |                            |         |                             |                            |
| Bicyclol (vs. Vitamin E)                   | 248 (1)        | -0.12 (-0.32, 0.08)         | ⊕⊕○○ LOW <sup>12</sup>     | N/A            | N/A                         | N/A                    | 248 (1) | <b>-0.65 (-0.80, -0.50)</b> | ⊕⊕⊕○ MODERATE <sup>2</sup> | 248 (1) | 0.10 (-0.03, 0.23)  | ⊕⊕○○ LOW <sup>12</sup>     | 248 (1) | <b>-0.21 (-0.37, -0.05)</b> | ⊕⊕⊕○ MODERATE <sup>2</sup> |
| Met (vs. Vitamin E)                        | 115 (1)        | -0.10 (-1.87, 1.67)         | ⊕⊕⊕○ MODERATE <sup>1</sup> | 115 (1)        | 0.70 (0.64, 0.76)           | ⊕⊕⊕⊕ HIGH              | 115 (1) | 0.10 (-1.13, 1.33)          | ⊕⊕⊕○ MODERATE <sup>1</sup> | 115 (1) | 0.20 (-1.30, 1.70)  | ⊕⊕⊕○ MODERATE <sup>1</sup> | 115 (1) | 0.20 (-1.57, 1.97)          | ⊕⊕⊕○ MODERATE <sup>1</sup> |
| Met (vs. TZD)                              | 49 (1)         | -1.00 (-1.24, -0.76)        | ⊕⊕⊕○ MODERATE <sup>2</sup> | 91 (2)         | 1.95 (-0.27, 4.17)          | ⊕⊕○○ LOW <sup>12</sup> | 49 (1)  | 0.00 (-0.33, 0.33)          | ⊕⊕○○ LOW <sup>12</sup>     | 49 (1)  | 1.00 (0.86, 1.14)   | ⊕⊕⊕○ MODERATE <sup>2</sup> | 49 (1)  | 0.00 (-0.33, 0.33)          | ⊕⊕⊕○ MODERATE <sup>2</sup> |
| Antiox (vs. UDCA)                          | <b>100 (1)</b> | <b>-0.23 (-0.31, -0.15)</b> | ⊕⊕⊕⊕ HIGH                  | <b>100 (1)</b> | <b>-0.14 (-0.24, -0.04)</b> | ⊕⊕⊕⊕ HIGH              | N/A     | N/A                         | N/A                        | N/A     | N/A                 | N/A                        | N/A     | N/A                         | N/A                        |
| Antiox + UDCA (vs. UDCA)                   | <b>99 (1)</b>  | <b>-0.46 (-0.52, -0.40)</b> | ⊕⊕⊕⊕ HIGH                  | <b>100 (1)</b> | <b>-0.46 (-0.52, -0.40)</b> | ⊕⊕⊕⊕ HIGH              | N/A     | N/A                         | N/A                        | N/A     | N/A                 | N/A                        | N/A     | N/A                         | N/A                        |
| Vitamin E +UDCA (vs. UDCA)                 | 33 (1)         | -0.70 (-1.69, 0.29)         | ⊕⊕⊕○ MODERATE <sup>1</sup> | N/A            | N/A                         | N/A                    | 33 (1)  | -0.20 (-0.79, 0.39)         | ⊕⊕⊕○ MODERATE <sup>1</sup> | 33 (1)  | -0.20 (-1.04, 0.64) | ⊕⊕⊕○ MODERATE <sup>1</sup> | 33 (1)  | <b>-0.90 (-1.75, -0.05)</b> | ⊕⊕⊕⊕ HIGH                  |
| TZD + Vitamin E (vs. Vitamin E)            | N/A            | N/A                         | N/A                        | N/A            | N/A                         | N/A                    | N/A     | N/A                         | N/A                        | 20 (1)  | -0.30 (-1.54, 0.94) | ⊕⊕○○ LOW <sup>12</sup>     | 20 (1)  | -0.50 (-2.95, 1.95)         | ⊕⊕○○ LOW <sup>12</sup>     |
| TZD + Met (vs. Met)                        | 44 (1)         | -4.60 (-7.12, -2.08)        | ⊕⊕⊕○ MODERATE <sup>1</sup> | N/A            | N/A                         | N/A                    | N/A     | N/A                         | N/A                        | N/A     | N/A                 | N/A                        | N/A     | N/A                         | N/A                        |
| TZD + Met (vs. TZD)                        | 42 (1)         | -1.30 (-3.77, 1.17)         | ⊕⊕⊕○ MODERATE <sup>1</sup> | N/A            | N/A                         | N/A                    | N/A     | N/A                         | N/A                        | N/A     | N/A                 | N/A                        | N/A     | N/A                         | N/A                        |
| TZD (vs. PTX)                              | 60 (1)         | -0.50 (-0.77, -0.23)        | ⊕⊕⊕⊕ HIGH                  | N/A            | N/A                         | N/A                    | N/A     | N/A                         | N/A                        | 60 (1)  | -0.19 (-0.51, 0.13) | ⊕⊕⊕○ MODERATE <sup>1</sup> | N/A     | N/A                         | N/A                        |



**Appendix Table 6.** League table presenting network meta-analysis estimates (lower triangle) and direct estimates (upper triangle) for change of fibrosis grade

|                             |                             |                             |                     |                             |                             |                     |                     |                      |                     |                     |                     |                      |                     |                    |                      |                             |
|-----------------------------|-----------------------------|-----------------------------|---------------------|-----------------------------|-----------------------------|---------------------|---------------------|----------------------|---------------------|---------------------|---------------------|----------------------|---------------------|--------------------|----------------------|-----------------------------|
| Vitamin E+ Vitamin C        | -                           | -                           | -                   | -                           | -                           | -                   | -                   | -                    | -                   | -                   | -                   | -                    | -                   | -                  | -                    | -0.09 (-0.29, 0.11)         |
| 0.80 (-0.18, 1.78)          | Vitamin E+ UDCA             | -                           | -                   | -0.70 (-1.69, 0.29)         | -                           | -                   | -                   | -                    | -                   | -                   | -                   | -                    | -                   | -                  | -                    | -0.90 (-1.82, 0.02)         |
| 0.21 (-0.16, 0.57)          | -0.61 (-1.58, 0.36)         | Antiox + UDCA               | -                   | -0.46 (-0.52, -0.40)        | -                           | -                   | -                   | -                    | -                   | -                   | -                   | -                    | -                   | -                  | -                    | -0.29 (-0.35, -0.23)        |
| -0.05 (-1.88, 1.78)         | -0.78 (-2.85, 1.29)         | -0.35 (-2.22, 1.51)         | Vitamin E           | -                           | -                           | -                   | -                   | -                    | -                   | -                   | -0.10 (-1.87, 1.67) | -0.12 (-0.32, 0.08)  | -                   | -                  | -                    | -0.10 (-1.87, 1.67)         |
| -0.25 (-0.62, 0.11)         | -0.70 (-1.71, 0.31)         | -0.46 (-0.69, -0.23)        | -0.27 (-2.07, 1.53) | UDCA                        | -                           | -                   | -                   | -                    | -                   | -                   | -                   | -                    | -                   | -                  | -0.23 (-0.31, -0.15) | <b>0.14 (0.07, 0.21)</b>    |
| 0.19 (-0.26, 0.65)          | -0.62 (-1.64, 0.40)         | -0.01 (-0.45, 0.43)         | 0.18 (-1.64, 2.00)  | 0.45 (0.005, 0.89)          | Weight or lipid control     | -                   | -                   | -                    | -                   | -                   | -                   | -                    | -                   | -                  | -                    | 0.20 (-0.26, 0.66)          |
| <b>-1.58 (-2.05, -1.10)</b> | <b>-2.40 (-3.42, -1.38)</b> | <b>-1.78 (-2.23, -1.34)</b> | -1.59 (-3.42, 0.23) | <b>-1.32 (-1.77, -0.88)</b> | <b>-1.77 (-2.31, -1.23)</b> | TZD                 | -                   | -0.50 (-0.77, -0.23) | -                   | -                   | -                   | -1.00 (-1.24, -0.76) | -                   | -                  | -                    | 0.40 (-0.99, 1.79)          |
| -0.07 (-0.42, 0.29)         | -0.88 (-1.85, 0.08)         | -0.28 (-0.59, 0.04)         | -0.08 (-1.88, 1.71) | 0.18 (-0.123, 0.50)         | -0.26 (-0.71, 1.84)         | 1.51 (1.08, 1.95)   | PUFA                | -                    | -                   | -                   | -                   | -                    | -                   | -                  | -                    | -0.04 (-0.38, 0.29)         |
| 0.51 (0.03, 0.10)           | -0.30 (-1.32, 0.72)         | 0.31 (-0.14, 0.76)          | 0.50 (-1.33, 2.32)  | 0.77 (0.31, 1.22)           | 0.32 (-0.22, 0.86)          | 2.10 (1.55, 2.64)   | 0.58 (0.14, 1.02)   | PTX                  | -                   | -                   | -                   | -                    | -                   | -                  | -                    | <b>-0.60 (-0.95, -0.25)</b> |
| 0.22 (-0.20, 0.64)          | -0.60 (-1.60, 0.40)         | 0.009 (-0.38, 0.40)         | 0.20 (-1.61, 2.01)  | 0.47 (0.08, 0.86)           | 0.02 (-0.47, 0.51)          | 1.80 (1.31, 2.29)   | 0.28 (-0.09, 0.66)  | -0.30 (-0.80, 0.20)  | OCA                 | -                   | -                   | -                    | -                   | -                  | -                    | <b>-0.30 (-0.52, -0.08)</b> |
| -0.10 (-0.56, 0.35)         | -0.92 (-1.93, 0.09)         | -0.31 (-0.73, 0.11)         | -0.12 (-1.94, 1.70) | 0.15 (-0.27, 0.57)          | -0.30 (-0.82, 0.22)         | 1.48 (0.96, 1.99)   | -0.03 (-0.44, 0.38) | -0.62 (-1.15, -0.09) | -0.32 (-0.79, 0.15) | Metadoxine          | -                   | -                    | -                   | -                  | -                    | 0.02 (-0.26, 0.30)          |
| -0.25 (-0.89, 0.39)         | -1.06 (-2.17, 0.04)         | -0.46 (-1.08, 0.16)         | 0.10 (-1.68, 1.88)  | 0.004 (-0.62, 0.63)         | -0.44 (-1.13, 0.39)         | 1.00 (0.67, 1.33)   | -0.18 (-0.80, 0.43) | -0.76 (-1.46, -0.07) | -0.46 (-1.12, 0.19) | -0.14 (-0.82, 0.53) | Met                 | -                    | -                   | -                  | -                    | <b>0.41 (0.14, 0.68)</b>    |
| 0.12 (-1.64, 1.89)          | -0.69 (-2.67, 1.29)         | -0.08 (-1.84, 1.68)         | 0.12 (-0.18, 0.42)  | 0.26 (-1.49, 2.02)          | -0.07 (-1.85, 1.71)         | -0.16 (-1.94, 1.62) | 0.19 (-1.56, 1.95)  | -0.39 (-2.17, 1.40)  | -0.09 (-1.86, 1.68) | 0.23 (-1.55, 2.00)  | 0.02 (-1.78, 1.81)  | Bicyclol             | -                   | -                  | -                    | -                           |
| 0.11 (-0.65, 0.88)          | -0.70 (-1.89, 0.48)         | -0.09 (-0.84, 0.66)         | 0.10 (-1.82, 2.01)  | 0.37 (-0.38, 1.12)          | -0.8 (-0.89, 0.72)          | 1.70 (0.89, 2.50)   | 0.18 (-0.56, 0.93)  | -0.40 (-1.21, 0.41)  | -0.10 (-0.88, 0.68) | 0.22 (-0.58, 1.01)  | 0.36 (-0.55, 1.28)  | -0.02 (-1.96, 1.92)  | Betaine             | -                  | -                    | -0.20 (-0.88, 0.48)         |
| -0.57 (-1.59, 0.44)         | -1.39 (-2.75, -0.03)        | -0.78 (-1.78, 0.22)         | -0.59 (-2.62, 1.44) | -0.32 (-1.32, 0.68)         | -0.77 (-1.81, 0.28)         | 1.01 (-0.03, 2.06)  | -0.50 (-1.50, 0.49) | -1.09 (-2.14, -0.04) | -0.79 (-1.81, 0.24) | -0.47 (-1.50, 0.57) | -0.32 (-1.45, 0.81) | -0.71 (-2.76, 1.35)  | -0.69 (-1.90, 0.52) | BIB                | -                    | 0.50 (-0.46, 1.46)          |
| 0.09 (-0.31, 0.49)          | -0.73 (-1.72, 0.26)         | -0.23 (-0.46, 0.005)        | 0.07 (-1.74, 0.26)  | 0.23 (-0.008, 0.47)         | -0.11 (-0.58, 0.36)         | 1.67 (1.19, 2.14)   | 0.15 (-0.20, 0.51)  | -0.43 (-0.91, 0.05)  | -0.13 (-0.55, 0.29) | 0.19 (-0.26, 0.64)  | 0.34 (-0.31, 0.98)  | -0.05 (-1.88, 1.78)  | -0.03 (-0.80, 0.74) | Antiox             | -                    | -0.09 (-0.18, 0.01)         |
| -0.08 (-0.36, 0.20)         | -0.90 (-1.85, 0.06)         | -0.29 (-0.52, -0.06)        | -0.10 (-1.88, 1.68) | 0.17 (-0.06, 0.40)          | -0.28 (-0.66, 0.10)         | 1.50 (1.12, 1.88)   | -0.02 (-0.22, 0.20) | -0.60 (-0.99, -0.21) | -0.30 (-0.61, 0.01) | 0.02 (-0.33, 0.37)  | 0.17 (-0.41, 0.75)  | -0.22 (-2.03, 1.59)  | -0.20 (-0.92, 0.52) | 0.50 (-0.48, 1.48) | -0.06 (-0.30, 0.18)  | Placebo                     |

**Appendix Table 7.** Assessing inconsistency tests of network meta-analysis at network levels

| Outcomes                       | Likelihood ratio test | Inconsistency tests of binary outcomes |                 | Likelihood ratio test | Inconsistency tests of continuous outcomes |                 |
|--------------------------------|-----------------------|----------------------------------------|-----------------|-----------------------|--------------------------------------------|-----------------|
|                                |                       | $\chi^2$                               | <i>p</i> -value |                       | $\chi^2$                                   | <i>p</i> -value |
| <b>Fibrosis</b>                | -14.69                | 4.17                                   | 0.3829          | -16.52                | 74.62                                      | 0.0000          |
| <b>Resolution of NASH</b>      | -4.96                 | 0.18                                   | 0.6716          | N/A                   | N/A                                        | N/A             |
| <b>NAS</b>                     | -7.59                 | 6.66                                   | 0.0837          | -14.96                | 89.33                                      | 0.0000          |
| <b>Steatosis</b>               | -12.13                | 4.21                                   | 0.2397          | -22.71                | 0.93                                       | 0.9681          |
| <b>Ballooning degeneration</b> | -10.59                | 2.64                                   | 0.4503          | -19.09                | 3.00                                       | 0.7008          |
| <b>Lobular inflammation</b>    | -9.94                 | 6.05                                   | 0.1090          | -15.44                | 6.96                                       | 0.2234          |

**Appendix Table 8.** Sensitivity and subgroup analyzes of network meta-analysis for improvement of fibrosis outcome

| Interventions           | Estimated effects of network meta-analysis; Risk ratio, RR (95%CI) |                          |                             |                                              |                                         |
|-------------------------|--------------------------------------------------------------------|--------------------------|-----------------------------|----------------------------------------------|-----------------------------------------|
|                         | Main analysis                                                      | Small studies omitted    | Low quality studies omitted | Included only studies with F/U $\geq$ 1 year | Included only studies with F/U < 1 year |
| PTX                     | 2.27 (0.81, 6.36)                                                  | N/A                      | 2.30 (0.78, 6.71)           | 5.91 (0.37, 95.02)                           | 1.95 (0.64, 5.91)                       |
| <b>Obeticholic acid</b> | <b>1.91 (1.15, 3.16)</b>                                           | <b>1.91 (1.15, 3.16)</b> | <b>1.91 (1.04, 3.50)</b>    | <b>1.91 (1.15, 3.16)</b>                     | N/A                                     |
| Weight or lipid control | 1.74 (0.55, 5.51)                                                  | N/A                      | 1.74 (0.53, 5.69)           | N/A                                          | 2 (0.68, 5.85)                          |
| TZD + Met               | 1.52 (0.79, 2.94)                                                  | 1.5 (0.77, 2.95)         | N/A                         | 1.5 (0.77, 2.94)                             | N/A                                     |
| Metadoxine              | 1.35 (0.57, 3.21)                                                  | 1.35 (0.57, 3.21)        | 1.35 (0.53, 3.42)           | N/A                                          | 1.35 (0.57, 3.21)                       |
| TZD                     | 1.33 (0.96, 1.83)                                                  | 1.31 (0.92, 1.87)        | 1.28 (0.76, 2.15)           | 1.31 (0.92, 1.87)                            | 1.48 (0.69, 3.17)                       |
| Vitamin E + Vitamin C   | 1.27 (0.66, 2.44)                                                  | 3 (0.32, 27.76)          | 1.17 (0.55, 5.69)           | 3 (0.32, 27.76)                              | 1.17 (0.59, 2.32)                       |
| Met                     | 1.25 (0.81, 1.93)                                                  | 1.34 (0.85, 2.1)         | 1.20 (0.67, 2.16)           | 1.34 (0.85, 2.10)                            | 0.34 (0.05, 2.20)                       |
| TZD + Losartan          | 1.24 (0.61, 2.53)                                                  | 1.23 (0.59, 2.54)        | N/A                         | 1.23 (0.59, 2.54)                            | N/A                                     |
| Vitamin E               | 1.23 (0.89, 1.69)                                                  | 1.24 (0.89, 1.72)        | 1.18 (0.76, 1.83)           | 1.24 (0.89, 1.72)                            | N/A                                     |
| UDCA                    | 0.90 (0.41, 1.96)                                                  | 0.9 (0.41, 1.96)         | 0.90 (0.38, 2.10)           | 0.90 (0.41, 1.96)                            | N/A                                     |
| PUFA                    | 0.58 (0.22, 1.57)                                                  | N/A                      | 0.58 (0.21, 1.62)           | N/A                                          | N/A                                     |
| Betaine                 | N/A                                                                | N/A                      | N/A                         | 0.58 (0.22, 1.57)                            | N/A                                     |

**Appendix Table 9.** Ranking of interventions in network meta-analysis for binary outcomes, after included studies with sample sizes exceed 25<sup>th</sup> percentile

| Interventions          | Risk Ratio: RR (95%CI)    | pbest (%) | Rank | SUCRA | Rank |
|------------------------|---------------------------|-----------|------|-------|------|
| <b>Fibrosis</b>        |                           |           |      |       |      |
| Vitamin E + Vitamin C  | 3 (0.32, 27.76)           | 32.5      | 2    | 0.7   | 2    |
| <b>OCA</b>             | <b>1.91 (1.15, 3.16)</b>  | 6.5       | 4    | 0.7   | 2    |
| TZD + Met              | 1.5 (0.77, 2.95)          | 39.5      | 1    | 0.8   | 1    |
| Metadoxine             | 1.35 (0.57, 3.21)         | 2.8       | 5    | 0.5   | 3    |
| Met                    | 1.34 (0.85, 2.1)          | 0.4       | 7    | 0.4   | 4    |
| TZD                    | 1.31 (0.92, 1.87)         | 1.4       | 6    | 0.4   | 4    |
| Vitamin E              | 1.24 (0.89, 1.72)         | 0.1       | 9    | 0.2   | 5    |
| TZD + LOS              | 1.23 (0.59, 2.54)         | 16.6      | 3    | 0.7   | 2    |
| UDCA                   | 0.9 (0.41, 1.96)          | 0.3       | 8    | 0.2   | 5    |
| <b>Resolution NASH</b> |                           |           |      |       |      |
| <b>TZD</b>             | <b>2.42 (1.53, 3.82)</b>  | 0.367     | 1    | 0.8   | 1    |
| <b>Vitamin E</b>       | <b>2.07 (1.39, 3.09)</b>  | 0.297     | 2    | 0.8   | 1    |
| LOS + TZD              | 1.83 (0.78, 4.32)         | 0.113     | 4    | 0.5   | 2    |
| OCA                    | 1.70 (0.89, 3.25)         | 0.076     | 5    | 0.4   | 3    |
| Met + TZD              | 1.68 (0.71, 3.99)         | 0.021     | 6    | 0.4   | 3    |
| Met                    | 1.44 (0.82, 2.52)         | 0.126     | 3    | 0.5   | 2    |
| <b>NAS</b>             |                           |           |      |       |      |
| <b>Vitamin E</b>       | <b>2.24 (1.52, 3.31)</b>  | 0.403     | 1    | 0.8   | 1    |
| <b>OCA</b>             | <b>2.19 (1.42, 3.38)</b>  | 0.302     | 2    | 0.8   | 1    |
| LOS + TZD              | (1.07, 3.76) <sup>2</sup> | 0.229     | 3    | 0.8   | 1    |
| TZD                    | 1.76 (1.09, 2.84)         | 0.035     | 4    | 0.6   | 2    |
| Met                    | 1.47 (0.83, 2.60)         | 0.016     | 5    | 0.5   | 3    |
| Met + TZD              | 1.47 (0.76, 2.86)         | 0.015     | 6    | 0.5   | 3    |
| Vitamin E + Vitamin C  | 0.94 (0.53, 1.66)         | 0.001     | 7    | 0.2   | 4    |
| PUFA                   | 0.87 (0.56, 1.35)         | 0         | 8    | 0.1   | 5    |
| <b>Steatosis</b>       |                           |           |      |       |      |
| <b>MDX</b>             | <b>2.97 (1.55, 5.70)</b>  | 0.427     | 1    | 0.8   | 1    |
| <b>LOS + TZD</b>       | <b>2.78 (1.61, 4.78)</b>  | 0.28      | 2    | 0.8   | 1    |
| <b>Met + TZD</b>       | <b>2.35 (1.34, 4.12)</b>  | 0.133     | 3    | 0.7   | 2    |
| <b>TZD</b>             | <b>1.95 (1.47, 2.59)</b>  | 0.02      | 6    | 0.6   | 3    |
| <b>OCA</b>             | <b>1.69 (1.21, 2.36)</b>  | 0.061     | 4    | 0.5   | 4    |
| <b>Vitamin E</b>       | <b>1.64 (1.23, 2.18)</b>  | 0.028     | 5    | 0.4   | 5    |
| <b>Met</b>             | <b>1.53 (1.02, 2.28)</b>  | 0.028     | 5    | 0.4   | 5    |
| UDCA                   | 1.18 (0.71, 1.95)         | 0.017     | 7    | 0.3   | 6    |
| Vitamin E + Vitamin C  | 1.00 (0.56, 1.79)         | 0.008     | 8    | 0.2   | 7    |
| <b>Ballooning</b>      |                           |           |      |       |      |
| <b>Met</b>             | <b>2.13 (1.28, 3.54)</b>  | 0.36      | 1    | 0.8   | 1    |
| <b>Vitamin E</b>       | <b>2.06 (1.45, 2.93)</b>  | 0.191     | 2    | 0.8   | 1    |
| <b>TZD</b>             | <b>1.72 (1.15, 2.58)</b>  | 0.024     | 7    | 0.6   | 2    |
| TZD + LOS              | 1.71 (0.76, 3.84)         | 0.182     | 3    | 0.6   | 2    |
| OCA                    | 1.58 (1.06, 2.34)         | 0.055     | 6    | 0.5   | 3    |
| Met + TZD              | 1.44 (0.63, 3.3)          | 0.074     | 5    | 0.5   | 3    |
| UDCA                   | 1.34 (0.56, 3.23)         | 0.11      | 4    | 0.4   | 4    |

| <b>Interventions</b>               | <b>Risk Ratio: RR (95%CI)</b> | <b>pbest (%)</b> | <b>Rank</b> | <b>SUCRA</b> | <b>Rank</b> |
|------------------------------------|-------------------------------|------------------|-------------|--------------|-------------|
| Vitamin E + Vitamin C              | 0.50 (0.16, 1.54)             | 0.004            | 8           | 0            | 5           |
| <b><i>Lobular inflammation</i></b> |                               |                  |             |              |             |
| <b>OCA</b>                         | <b>1.60 (1.05, 2.43)</b>      | 0.259            | 1           | 0.8          | 1           |
| <b>TZD</b>                         | <b>1.59 (1.11, 2.17)</b>      | 0.283            | 2           | 0.8          | 1           |
| LOS + TZD                          | 1.45 (0.65, 3.21)             | 0.247            | 3           | 0.7          | 2           |
| <b>Vitamin E</b>                   | <b>1.44 (1.03, 2.01)</b>      | 0.022            | 7           | 0.4          | 4           |
| Met                                | 1.35 (0.84, 2.17)             | 0.036            | 6           | 0.5          | 3           |
| Met + TZD                          | 1.22 (0.54, 2.76)             | 0.101            | 4           | 0.5          | 3           |
| Vitamin E + Vitamin C              | 1.00 (0.49, 2.05)             | 0.039            | 5           | 0.3          | 5           |
| UDCA                               | 0.74 (0.33, 1.69)             | 0.013            | 8           | 0.2          | 6           |
